# 1 **Electrocorticographic dissociation of** 2 **alpha and beta rhythmic activity in the** 3 **human sensorimotor system**

4 Arjen Stolk<sup>1,2</sup>, Loek Brinkman<sup>3</sup>, Mariska J. Vansteensel<sup>3</sup>, Erik Aarnoutse<sup>3</sup>, Frans S. S. Leijten<sup>3</sup>,  
5 Chris H. Dijkerman<sup>4</sup>, Robert T. Knight<sup>1</sup>, Floris P. de Lange<sup>2</sup>, Ivan Toni<sup>2</sup>

6  
7 <sup>1</sup>Helen Wills Neuroscience Institute, University of California, Berkeley, CA, USA;

8 <sup>2</sup>Donders Institute for Brain, Cognition, and Behaviour, Radboud University, Nijmegen, The Netherlands;

9 <sup>3</sup>UMC Utrecht Brain Center, Department of Neurology and Neurosurgery, UMC Utrecht, Utrecht, The  
10 Netherlands;

11 <sup>4</sup>Helmholtz Institute, Experimental Psychology, Utrecht University, Utrecht, The Netherlands

12  
13 Impact statement: Direct cortical recordings in humans link the spectral structure of local field  
14 potentials to inhibition/disinhibition mechanisms coordinating sensorimotor neuronal populations  
15 during movement selection.

16 **Abstract** This study uses electrocorticography in humans to assess how alpha- and beta-band  
17 rhythms modulate excitability of the sensorimotor cortex during movement selection, as indexed  
18 through a psychophysically-controlled movement imagery task. Both rhythms displayed effector-  
19 specific modulations, tracked spectral markers of action potentials in the local neuronal population,  
20 and showed spatially systematic phase relationships (traveling waves). Yet, alpha- and beta-band  
21 rhythms differed in their anatomical and functional properties, were weakly correlated, and  
22 traveled along opposite directions across the sensorimotor cortex. Increased alpha-band power in  
23 the somatosensory cortex ipsilateral to the selected arm was associated with spatially-unspecific  
24 inhibition. Decreased beta-band power over contralateral motor cortex was associated with a focal  
25 shift from relative inhibition to excitation. These observations indicate the relevance of both  
26 inhibition and disinhibition mechanisms for precise spatiotemporal coordination of neuronal  
27 populations during movement selection. Those mechanisms are implemented through the  
28 substantially different neurophysiological properties of sensorimotor alpha- and beta-band  
29 rhythms.

30

31

32

## 33 Introduction

34 To control a movement, specific neuronal populations supporting particular features of that  
35 movement need to be facilitated while other populations need to be suppressed (Ebbesen and  
36 Brecht, 2017; Greenhouse et al., 2015; Mink, 1996). Both operations need to be organized in a  
37 precise spatiotemporal pattern, such that the demands of coordinating body segments for  
38 movement are dynamically solved through the selective excitation and inhibition of relevant and  
39 irrelevant sensorimotor neuronal populations (Bruno et al., 2015; Dombeck et al., 2009; Graziano,  
40 2016; Shenoy et al., 2013). One putative mechanism through which this sensorimotor coordination  
41 is implemented is the rhythmic modulation of neuronal local field potentials in the alpha (8 - 12 Hz)  
42 and beta (15 - 25 Hz) frequency range (Brovelli et al., 2004; Pfurtscheller and Berghold, 1989;  
43 Picazio et al., 2014; van Wijk et al., 2012).

44 Neuronal local field potentials in the sensorimotor cortex are organized in two prominent  
45 spectral clusters, alpha- and beta-band rhythms, known to be relevant for movement selection and  
46 to differ across several features. For instance, there are differences in the cortico-subcortical loops  
47 supporting alpha- and beta-band rhythms (Bastos et al., 2014; Leventhal et al., 2012;  
48 Schreckenberger et al., 2004; West et al., 2018), and only the latter rhythm has clear modulatory  
49 effects on corticospinal neurons (Baker et al., 1997; Madsen et al., 2019; Mima and Hallett, 1999;  
50 van Elswijk et al., 2010). Yet, the neurophysiological characteristics of alpha- and beta-band  
51 rhythms have often been studied by aggregating these two rhythms into the same ( $\mu$ -) rhythm  
52 category (Cuevas et al., 2014; Hari, 2006; Miller et al., 2010), an approach often justified by the  
53 partial overlap in their spatial and spectral distributions (Bressler and Richter, 2015; Haegens et al.,  
54 2014; Salmelin and Hari, 1994; Szurhaj et al., 2003) and by the temporal correlation of their power  
55 envelopes (Carlqvist et al., 2005; de Lange et al., 2008; Tiihonen et al., 1989). By aggregating those  
56 rhythms, it has been recently shown that 4–22 Hz activity modulates high-frequency broadband  
57 power in primates' frontal cortex (Bastos et al., 2018; Johnston et al., 2019), and that 10-45 Hz  
58 activity is spatially organized in traveling waves (Rubino et al., 2006; Takahashi et al., 2015). It  
59 remains unclear, however, whether that aggregation could obscure differential contributions of  
60 those rhythms to movement selection. For instance, it is an open question whether alpha- and beta-  
61 band rhythms modulate the excitability of the same neuronal ensembles in the same direction  
62 when a movement is selected across the sensorimotor cortex (Brinkman et al., 2016, 2014).

63 Here we used direct recordings from the human cortical surface (electrocorticography,  
64 ECoG; Figure 1A) to assess the anatomical and functional specificity of alpha- and beta-band  
65 rhythms and their effects on the local excitability of sensorimotor neuronal ensembles during

66 **performance of a task indexing** movement selection. Local cortical effects were quantified through  
67 two complementary power-spectral metrics of excitability. First, we considered high-frequency (60  
68 - 120 Hz) content in the ECoG signal, a mesoscale correlate of action potentials and dendritic  
69 currents in the local neural population (Leszczynski et al., n.d.; Manning et al., 2009; Miller et al.,  
70 2009; Ray and Maunsell, 2011; Rich and Wallis, 2017). Second, we considered the slope of the  
71 power-spectral density function ( $1/f$  slope), a **putative** summary index of synaptic  
72 excitation/inhibition balance (Gao et al., 2017). Furthermore, rather than assuming that alpha- and  
73 beta-band rhythms are spatially stationary across the sensorimotor cortex (Brinkman et al., 2016,  
74 2014), we examined the spatiotemporal distribution of the two sensorimotor rhythms and their  
75 cortical effects through two complementary analyses. First, we considered the organization of  
76 spatially systematic phase relationships among rhythmic signals (traveling waves) across the  
77 sensorimotor cortex (Ermentrout and Kleinfeld, 2001; Muller et al., 2018). Second, we explored the  
78 spatiotemporal relation between rhythm strength and local cortical excitability through analysis of  
79 representational similarity between those spectral markers (Kriegeskorte et al., 2006).

80 This neurophysiological characterization of alpha- and beta-band rhythms is based on a  
81 principled differentiation of the two sensorimotor rhythms along spectral, anatomical, and  
82 movement-related dimensions. Spectrally, alpha- and beta-band signals were disambiguated from  
83 arrhythmic spectral components in each individual participant (Wen and Liu, 2015). This  
84 procedure increases spectral precision and physiological interpretability by controlling for the  
85 effects of task-related power-spectral  $1/f$  modulations over those rhythms (He, 2014).  
86 Anatomically, the ECoG recordings were precisely registered to the cortical anatomy of each patient  
87 (Stolk et al., 2018), and sorted according to the sensorimotor responses evoked by electrical  
88 stimulation of the electrodes. Functionally, the movement-related specificity of alpha- and beta-  
89 band signals was experimentally controlled by using imagined movements psychophysically-  
90 matched to actual movements (Figure 1B, (Brinkman et al., 2014; Rosenbaum et al., 1995)). **This**  
91 **procedure is grounded on the close correspondence between neural mechanisms of movement**  
92 **selection and motor imagery. Besides sharing motor control variables and sensitivity to**  
93 **biomechanical constraints** (de Lange et al., 2006; Gentili et al., 2004; Vargas et al., 2004), **movement**  
94 **selection and motor imagery evoke the same activity patterns in dorsal premotor cortex and in the**  
95 **subthalamic nucleus** (Cisek and Kalaska, 2004; Kühn et al., 2006), **leading to similar consequences**  
96 **on the excitability of the corticospinal system** (Lebon et al., 2019). **Moreover, using motor imagery**  
97 **increases functional interpretability by avoiding confounding execution-related somatosensory**

98 reafference known to differentially affect post-movement power dynamics in the alpha- and beta-  
99 bands (Alayrangues et al., 2019; Jurkiewicz et al., 2006; Tan et al., 2016).

100

## 101 Results

### 102 Direct cortical recording during psychophysically-controlled movement imagery

103 Neurosurgical epilepsy patients implanted with subdural grid and strip electrode arrays for clinical  
104 diagnostic purposes performed up to three sessions of a movement imagery task where they  
105 imagined how to grasp an object with either their left or right hand. Eleven patients participated,  
106 eight with left hemisphere arrays, and three with arrays on the right (see overlay on a template  
107 brain in Figure 1A). Two participants experienced difficulties adhering to the task instructions and  
108 were excluded from further analysis.

109 The motor imagery task involved 60 trials per session. Each trial started with the  
110 presentation of a black-white cylinder on a computer screen. Participants imagined how to grasp  
111 the middle-third of that cylinder with either their left or right hand, in alternating blocks of 10 trials  
112 (Figure 1B). After a fixed amount of time, a response screen appeared where the participants  
113 indicated whether their thumb was on the black or the white part of the cylinder at the end of the  
114 imagined movement. The response screen consisted of two squares on the horizontal plane (one  
115 black and one white), where participants indicated 'black' or 'white' by pressing the corresponding  
116 button using their left or right thumb on a button box that they held with both hands. The relative  
117 location of the black and white squares on the screen was pseudo-randomized across trials to  
118 prevent the preparation of the thumb response during the simulation of the grasping movements.

119 The task was designed to assess whether participants produced imaginary movements  
120 conforming to the biomechanical constraints of the corresponding real movements. On each trial,  
121 the cylinder was pseudo-randomly tilted according to 1 of 15 possible orientations, spanning 0 to  
122 360°. This task manipulation resulted in trials affording both overhand and underhand grasping,  
123 and trials that afforded grasping in a single manner only due to biomechanical constraints of the  
124 hand. As seen in Figure 1C, the preferred manner in which participants imagined grasping the  
125 cylinder (thumb on black or white part) depended on the orientation of the cylinder and followed  
126 the biomechanical constraints of the body. This is supported by a psychophysical analysis showing  
127 that a sine-wave fit to the over-/underhand data points explained  $81 \pm 4$  % of the variance in the  
128 left-hand condition ( $M \pm SEM$ ;  $t(8) = 18.4$ ,  $p < 0.001$ ) and  $76 \pm 4$  % in the right-hand condition ( $t(8)$   
129  $= 21.6$ ,  $p < 0.001$ ), consistent with the prediction of two orientation-dependent switch points in  
130 each hand's response curve, i.e., the 50% crossings in Figure 1C (Brinkman et al., 2014).

131  
132

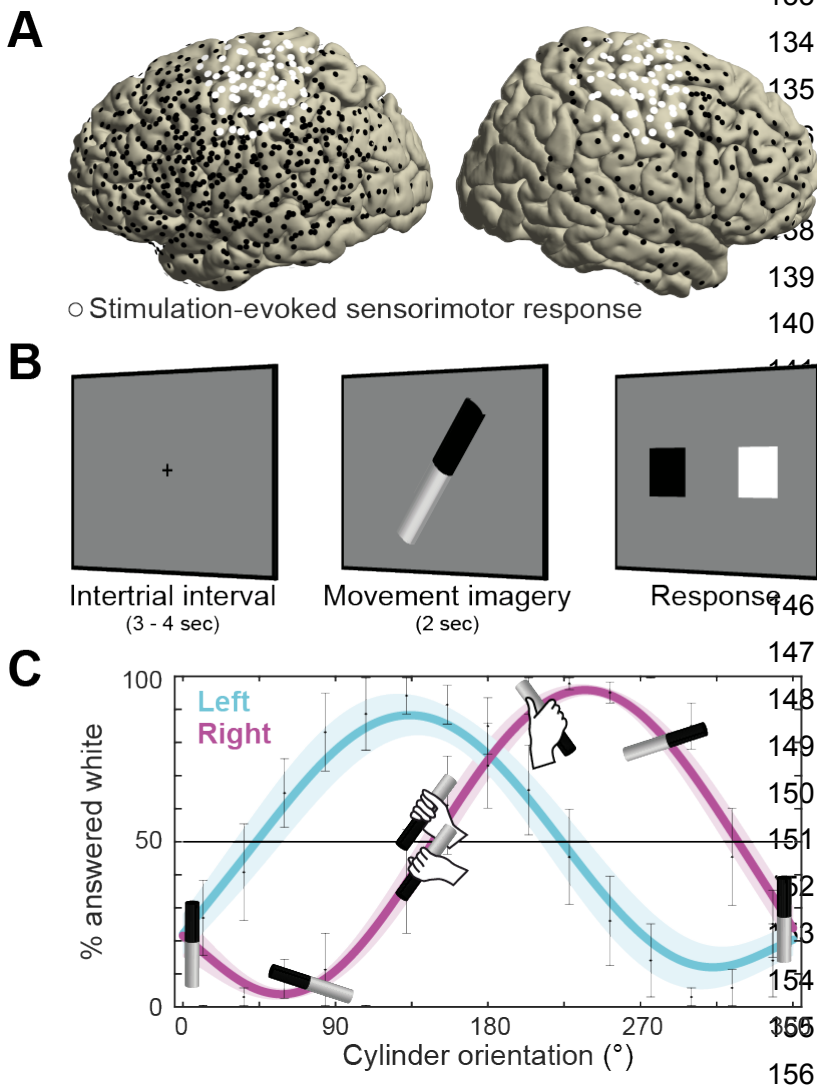

133 **Figure 1.** Recording electrode  
134 locations and movement  
135 imagery task. (A) Neural signals  
136 were recorded from the cortical  
137 surface of eleven epilepsy  
138 patients that were implanted  
139 with subdural electrode grids  
140 and strips. The electrode  
141 locations of all participants are  
142 overlaid on a template brain  
143 (black markers). Electrodes  
144 resulting in either a  
145 somatomotor or somatosensory  
146 response in the upper limb upon  
147 electrical stimulation are  
148 highlighted in white. (B)  
149 Participants imagined grasping  
150 the middle-third of a black-white  
151 cylinder with either their left  
152 or right hand. At the response  
153 screen, they indicated whether  
154 their thumb was on the black  
155 or the white part of the cylinder  
156 at the end of the imagined

157 movement. (C) The preferred manner in which the cylinder was grasped (thumb on black or white part,  
158 related to overhand vs. underhand grasping) was modulated as a function of the cylinder's orientation and  
159 differed for the left and right hand. Error bars indicate  $M \pm SEM$  over nine participants. Lines and shaded  
160 areas indicate  $M \pm SEM$  of sine-wave fits to individual over-/underhand data points.

161

162 Eight out of nine participants additionally completed a control task that used the same  
163 visual input and response contingencies as the motor imagery task, but where no imagery was  
164 required. In the control task, the surface areas of the cylinder differed slightly across trials, e.g.,  
165 54% black and 46% white, and participants reported which side of the black-white cylinder was  
166 larger. This allowed correcting for neural changes unrelated to the movement imagery process,

167 such as those evoked by the visual input. Participants performed the control task with high  
168 accuracy ( $99.4 \pm 0.3$  % correct,  $M \pm SEM$ ).

169 In the following sections, we first characterize the anatomical distribution and task-related  
170 temporal profile of neuronal ensembles supporting alpha- and beta-band rhythms across the  
171 sensorimotor cortex, as well as the functional consequences of electrical stimulation of those  
172 ensembles. Afterward, we assess the influence of those rhythms on the spatiotemporal pattern of  
173 sensorimotor excitability during the selection of a movement and the spatiotemporal organization  
174 of those rhythms across the sensorimotor cortex.

175

### 176 **Alpha- and beta-band rhythms build on anatomically distinct neuronal ensembles**

177 Neuronal ensembles producing sensorimotor alpha- and beta-band rhythms across the human  
178 sensorimotor cortex were isolated with a four-step procedure. The goal of the procedure is to  
179 characterize the spatial distribution of rhythmic and spectrally homogeneous neural activity in  
180 sensorimotor areas in each participant's subdural grid and strip electrode arrays.

181 First, for each participant, we selected electrodes that upon electrical stimulation yielded  
182 somatomotor or somatosensory responses of the upper limb contralateral to the cortical grid (i.e.,  
183 twitches, movements, tingling of fingers, hand, wrist, arm, or shoulder). This procedure identified  
184 cortical regions supporting sensorimotor components of movement (white electrodes in Figure 1A,  
185 2A). Seven out of nine participants showed such responses, indicating sensorimotor coverage in  
186 these participants. Second, we used irregular-resampling auto-spectral analysis (IRASA, (Wen and  
187 Liu, 2015)) of the neural signal recorded at the stimulation-positive electrodes. This procedure  
188 isolated specific rhythmic activity embedded in the concurrent broadband  $1/f$  modulations. Third,  
189 mean and full-width at half-maximum of alpha and beta spectral distributions were defined for  
190 each participant using a Gaussian model (red and blue areas of the power-spectra in Figure 2A).  
191 This adaptive approach (Supplemental Data) avoids having to rely on canonical frequency bands  
192 that may not accurately capture the neural phenomena of interest in each individual (Haegens et al.,  
193 2014; Szurhaj et al., 2003). Five out of seven participants had a rhythmic power-spectral  
194 component that overlapped with the 8 - 12 Hz alpha frequency range, one had a rhythmic  
195 component below that range, and all seven had a rhythmic component that overlapped with the 15  
196 - 25 Hz beta range (Figure S1). Participant S7 exhibited only a single rhythmic component (in the  
197 beta **frequency** range) and was excluded from further analysis. On average, the remaining six  
198 participants' alpha and beta frequency bands were centered on  $7.4 \pm 0.7$  and  $16.9 \pm 1.1$  Hz ( $M \pm$   
199 SEM), respectively. Fourth, we localized cortical sites showing relative maxima in alpha and beta

200 power. We selected electrodes that exceeded the upper limit of the 99% confidence interval for  
201 absolute spectral power in the respective frequency band across all stimulation-positive electrodes  
202 defined by the first step. This analysis yielded  $4.0 \pm 1.2$  alpha and  $3.4 \pm 0.8$  beta peak activity  
203 electrodes for participants S1 - S5 ( $M \pm SEM$ , red and blue electrodes in Figures 2A and S1). Due to  
204 limited sensorimotor coverage, the number of electrodes could not be narrowed down for  
205 participant S6, and the four stimulation-positive electrodes in this participant were used for the  
206 analysis of temporal dynamics only.

207         The cortical sites isolated through this principled four-step procedure had systematically  
208 different functional and anatomical properties. All 20 electrodes with alpha-band local maxima  
209 were located posterior to the central sulcus,  $\chi^2(19) = 40, p < 0.001$  (pre vs. postcentral sulcus), see  
210 the red electrodes in Figure 2D. As seen in the same figure, the 17 blue electrodes with beta-band  
211 local maxima were localized to both sides of the central sulcus,  $\chi^2(16) = 1.1, p = 0.3$  (7 pre- and 10  
212 postcentral). Furthermore, only 7 out of 30 combined unique electrodes were local maxima for both  
213 sensorimotor rhythms, suggesting that alpha- and beta-band rhythms involve largely different  
214 neuronal ensembles,  $\chi^2(29) = 17, p < 0.001$ . On average, alpha- and beta-band local maxima were  
215 separated by  $11.8 \pm 2.2$  mm ( $M \pm SEM$ ).

216



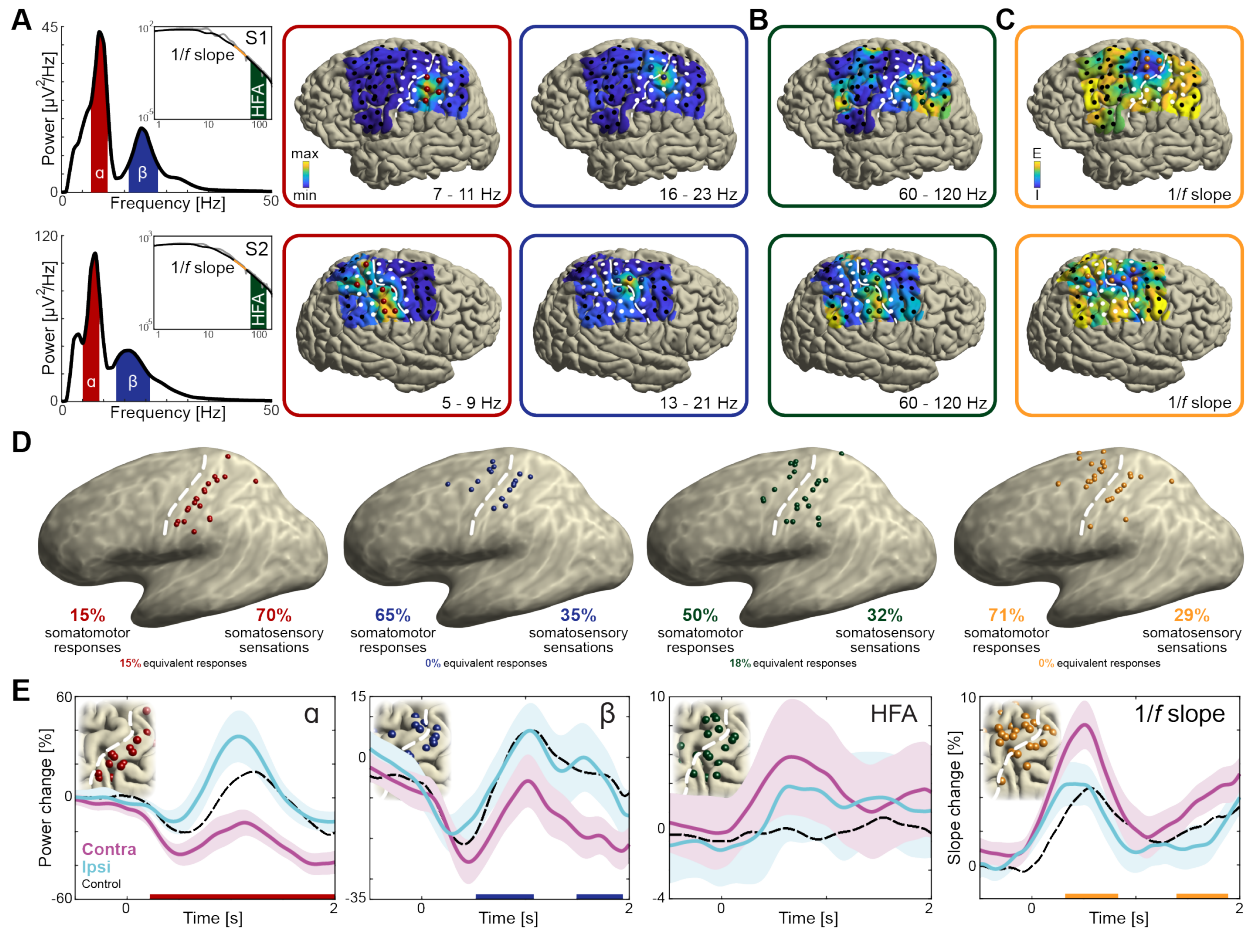

217

218 **Figure 2.** Anatomical and functional dissociation of sensorimotor alpha and beta. (A) Spectral and spatial  
 219 distributions of alpha and beta rhythmic activity during imagined movement in two representative  
 220 individuals. The insets show in log-log space the original power-spectra (in gray) and extracted arrhythmic  
 221 1/f content (black) that gave rise to the participant-specific rhythmic content shown in the main graph on the  
 222 left. The color axes of the cortical maps run from minimum in blue to maximum absolute spectral power in  
 223 yellow. White electrodes yielded somatomotor or somatosensory responses of the upper limb following  
 224 electrical stimulation. Red and blue electrodes represent alpha- and beta-band local maxima across the  
 225 sensorimotor cortex, respectively. (B) As the cortical maps in A, but for 60 to 120 Hz high-frequency  
 226 arrhythmic content (HFA) of the ECoG signal. Green electrodes represent high-frequency-band local maxima  
 227 across the sensorimotor cortex. (C) Ditto, but for the 1/f slope between 30 and 50 Hz, indicated by the orange  
 228 graph sections in the insets of A. The 1/f slope is a putative power-spectral index of synaptic  
 229 excitation/inhibition balance. Orange electrodes represent sensorimotor sites with relatively the strongest  
 230 inhibition, i.e., the steepest slope. (D) Template brains showing the local maxima from five individuals  
 231 visualized on the left hemisphere. Alpha is maximal at electrodes on the postcentral gyrus that yielded  
 232 somatosensory sensations of the upper limb following electrical stimulation (red electrodes). In contrast, beta  
 233 is strongest at electrodes placed over the central sulcus, with electrical stimulation yielding both movements

234 and somatosensory sensations (blue electrodes). White dashed lines indicate central sulci. (E) Temporal  
235 dynamics of power changes aggregated across the relevant local maxima during imagined movement of the  
236 contralateral or ipsilateral hand. Both neuronal ensembles producing alpha and beta rhythms showed  
237 effector-specific modulation during motor imagery, from 0 to 2 sec. Shaded areas indicate  $\pm 1$  SEM. Colored  
238 bars along the x-axes indicate time intervals of statistically significant lateralization effects. Dashed black  
239 lines represent mean activity in the control task, for reference.

240

### 241 **Alpha- and beta-band rhythms build on neuronal ensembles with different sensorimotor** 242 **properties: effects of electrical stimulation**

243 To test whether the neuronal ensembles generating alpha and beta rhythms had different  
244 functional properties, we probed the somatosensory and motor responses evoked by electrical  
245 stimulation of those ensembles. As indicated in Figure 2D, alpha electrodes yielded predominantly  
246 (14 out of 20 electrodes, 70%) somatosensory sensations of the contralateral upper limb following  
247 electrical stimulation,  $\chi^2(19) = 12.4, p < 0.001$ . Additionally, a subset of electrodes (3 out of 20,  
248 15%) were part of equally many stimulation electrode pairs yielding both somatomotor and  
249 somatosensory responses. These observations suggest that alpha activity predominantly supports  
250 somatosensory components of a movement, in line with its anatomical distribution along the  
251 postcentral gyrus. By contrast, beta electrodes were marginally more likely (11 out of 17, 65%) to  
252 elicit a somatomotor than a somatosensory response of the upper limb following electrical  
253 stimulation,  $\chi^2(16) = 2.9, p = 0.086$ .

254

### 255 **Alpha- and beta-band rhythms contribute to movement selection with different temporal** 256 **dynamics**

257 Since alpha and beta rhythms are anatomically and functionally separated at the cortical level, we  
258 asked whether the neuronal ensembles supporting the two sensorimotor rhythms provide different  
259 contributions to the selection of a movement. We considered the temporal dynamics of power  
260 changes in alpha- and beta-band rhythms, aggregated across the relevant local maxima. **These**  
261 **temporal dynamics were highly correlated ( $r = 0.7 \pm 0.1, M \pm SEM, p < 0.002$ ) and both alpha- and**  
262 **beta-band power was more strongly attenuated for the hemisphere contralateral to the hand used**  
263 **in the imagined movement, see Figure 2E. Yet it can be seen from the same graph that alpha-band**  
264 **power increases in the (postcentral) cortex ipsilateral to the hand used for imagery, as compared to**  
265 **baseline levels (+34% between 910 and 1220 ms,  $p < 0.05$ ; alpha-band power also decreased by**  
266 **26% and 32% in the contralateral cortex between 170 and 850 ms and between 1230 and 2000 ms,**  
267 **respectively). In contrast, beta-band power decreases further in the (pre- and postcentral)**

268 contralateral cortex (-21% between 150 and 760 ms vs. -13% in the ipsilateral cortex between -180  
269 and 580 ms; there was another statistically significant change of -21% from baseline in the  
270 contralateral cortex between 1450 and 2000 ms). These differential power changes are robust on  
271 the single-trial level and, as seen in Figure S2, represented modulations of sustained rhythmic  
272 activity (Jones, 2016; Little et al., n.d.).

273         The temporal dynamics of these power changes are highly consistent with previous  
274 observations obtained from non-invasive electrophysiological recordings over sensorimotor cortex  
275 during performance of the same task, cf. Figure 3 in (Brinkman et al., 2014). In that  
276 magnetoencephalography (MEG) study, it was observed that as selection demands increased (when  
277 cylinder orientations afforded both over- and underhand grasping), alpha-band power increased in  
278 the sensorimotor cortex ipsilateral to the hand used for motor imagery, whereas beta-band power  
279 concurrently decreased in the contralateral sensorimotor cortex. We examined the alpha- and beta-  
280 band local maxima for similar effects, although the patients recorded in this ECoG study performed  
281 a substantially lower number of trials than the healthy participants of the MEG study (120 vs. 480,  
282 respectively). We defined high demand trials as trials involving cylinders oriented around the  
283 switch points estimated from each hand's response curve (range: three orientation bins per switch  
284 point, i.e., -24° to +24°). We compared alpha- and beta-band temporal dynamics on high demand  
285 trials with those on low demand trials, defined as trials with cylinder orientations orthogonal to the  
286 switch points and covering an equivalent range. It can be seen from Figure S3 that the direction of  
287 the effects is consistent with the previous MEG observations. There was a statistically significant  
288 decrease in contralateral beta rhythmic activity with increasing demand. However, the increase in  
289 ipsilateral alpha rhythmic activity did not pass the statistical threshold. Concerns regarding the  
290 limited number of trials refrained us from using the effects of task demand for further analyses.

291

### 292 **Alpha- and beta-band rhythms arise from spatiotemporally unrelated neuronal ensembles**

293 Since the temporal dynamics of alpha and beta rhythms aggregated across local maxima is  
294 functionally divergent, we asked whether that dissociation persists at more fine-grained levels of  
295 analysis across ECoG electrodes and trial-by-trial sensorimotor demands. First, we considered the  
296 temporal and spatial correlations between alpha- and beta-band power both between their  
297 respective local maxima (Figure 3A) and across the same functionally demarcated sensorimotor  
298 cortex (Figure 3B, C). It can be seen from the leftmost bars in these figures that alpha- and beta-  
299 band rhythms were temporally as well as spatially uncorrelated (all  $BF_{01} > 1.56$  in favor of the null  
300 hypothesis of no correlation). This finding is a merit of the current procedure separating alpha and

301 beta rhythmic activity from concurrent  $1/f$  modulations in the power spectrum, as power in the two  
 302 frequency bands was correlated when this shared variance was not accounted for (Figure S4).  
 303 Second, we considered the representational similarity of the temporal and spatial activity patterns  
 304 evoked during movement imagery in the alpha- and beta-bands (Kriegeskorte, 2008). **Instead of**  
 305 **calculating direct correlations between the temporal dynamics or the spatial distribution of alpha-**  
 306 **and beta-band power as above, this second-order correlation analysis quantifies the similarity in**  
 307 **sensitivity to sensorimotor demands across trials, independently from the frequency-specific**  
 308 **neural patterns evoked within a trial.** Alpha- and beta-band rhythms showed weak **resemblances in**  
 309 **sensitivity to trial-by-trial demands, for both sensorimotor demands contained by temporal**  
 310 **dynamics and activity patterns** (Figure 3D-F,  $BF_{01S}$  of 1.06, 1.01, and 0.73, respectively). These  
 311 relations between alpha- and beta-band effects indicate that the neuronal ensembles producing  
 312 these two sensorimotor rhythms have no substantial spatiotemporal correspondences, **neither**  
 313 **within trials nor across trials.**  
 314

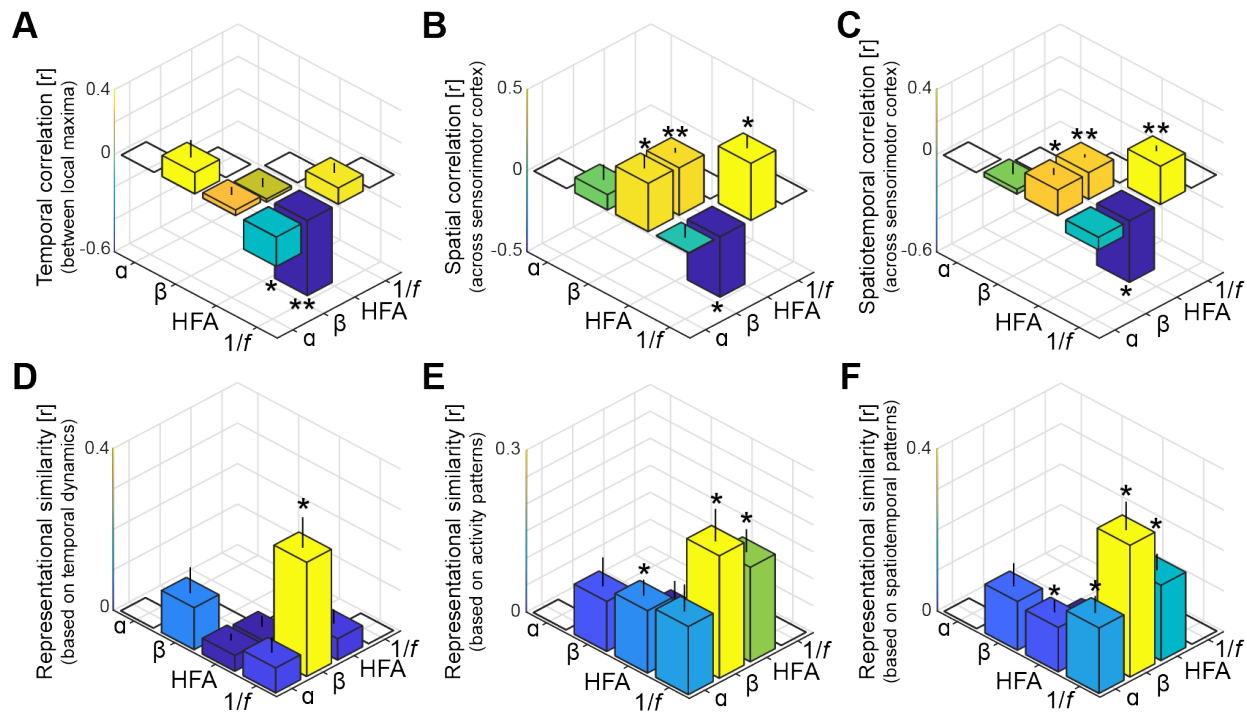

315  
 316 **Figure 3.** Spatiotemporal dissociation of sensorimotor alpha and beta. (A - C) Temporal, spatial, and  
 317 spatiotemporal correlations between alpha, beta, high-frequency activity (HFA), and the  $1/f$  slope. Alpha and  
 318 beta rhythms were weakly correlated in time and space during movement. Both alpha and beta showed a  
 319 positive relationship with high-frequency activity, yet only beta-band power closely tracked changes in the  
 320  $1/f$  slope across sensorimotor cortex (B and C). \*:  $p < 0.05$ ; \*\*:  $p < 0.001$ . (D - F) Alpha and beta rhythms  
 321 showed weak similarity in sensitivity to sensorimotor demands across different movements. Echoing the

322 correlations shown in panels A to C, beta is largely sensitive to the same trial-by-trial demands as the  $1/f$   
323 slope, for both sensorimotor demands contained by temporal dynamics (D) and activity patterns (E and F).  
324

### 325 **Alpha- and beta-band rhythms have different influence on local excitability**

326 The previous sections provide evidence for the notion that the neuronal ensembles generating  
327 alpha- and beta-band rhythms have different spatiotemporal characteristics during motor imagery,  
328 as well as different peripheral consequences following electrical stimulation. These observations  
329 confirm and qualify the findings of previous ECoG and SEEG reports on differences between alpha-  
330 and beta-band rhythms over the sensorimotor cortex (Brovelli et al., 2004; Crone et al., 1998;  
331 Jasper and Penfield, 1949; Saleh et al., 2010; Szurhaj et al., 2003; Toro et al., 1994; Vansteensel et  
332 al., 2013). Those clear differences between alpha- and beta-band rhythms raise the issue of  
333 understanding the functional consequences of those differences on the excitability of neuronal  
334 populations in the sensorimotor cortex during movement selection. We indexed those  
335 consequences through spectral markers of local population-level activity (arrhythmic high-  
336 frequency activity between 60 and 120 Hz (Manning et al., 2009; Miller et al., 2009; Ray and  
337 Maunsell, 2011)) and of local excitation/inhibition balance (steepness of the power-spectral  $1/f$   
338 slope, estimated between 30 and 50 Hz (Gao et al., 2017)). High-frequency activity showed spatial  
339 and temporal correspondences with both alpha- and beta-band rhythmic activity during movement  
340 selection (Figure 3B, C). This is also seen in the spatial distribution of local maxima in high-  
341 frequency activity (green electrodes in Figure 2D), which were localized to both sides of the central  
342 sulcus and involved neuronal ensembles producing alpha- or beta-band rhythmic activity (14/22: 4  
343 producing alpha, 4 producing beta, 6 producing both alpha and beta, and 8 with no overlap).  
344 However, the lack of clear effector-specificity (Figure 2E) limits the functional relevance of this  
345 index.

346 Unlike high-frequency activity, the  $1/f$  slope index showed clear functional specificity. This  
347 index was sensitive to the laterality of the effector involved in the motor imagery task (Figure 2E).  
348 This index was also spatially specific, with a focal reduction of excitation/inhibition ratio (i.e.,  
349 steepest  $1/f$  slopes, indicating stronger local inhibition) at electrodes placed over the central sulcus  
350 yielding predominantly somatomotor rather than somatosensory responses following electrical  
351 stimulation ( $\chi^2(27) = 10.3, p < 0.002$ ; orange electrodes in Figure 2C, D). The spatial specificity of  
352 the  $1/f$  slope index is further supported by a direct comparison with the spatial distribution of high-  
353 frequency activity: despite superficially similar distributions across the central sulcus (Figure 2D),  
354 only 3 out of 47 combined unique electrodes were both local maxima for high-frequency activity  
355 and local inhibition as indexed by the  $1/f$  slope. One of the main findings of this study is that the  $1/f$

356 slope index had a differential relationship with the two sensorimotor rhythms. Figure 3A-C  
357 illustrates the reciprocal changes observed between beta-band activity and the  $1/f$  slope during  
358 task performance. Namely, stronger reductions in beta-band power correlated with stronger  
359 increases in local excitability across sensorimotor cortex. Furthermore, electrodes with local  
360 maxima in beta-band activity and local inhibition were similarly distributed across the central  
361 sulcus, with a 59% (10/17) spatial correspondence. Given that both beta-band and  $1/f$  slope  
362 indexes were similarly responsive to the laterality of the effector involved in the motor imagery  
363 task (Figure 2E), the spatiotemporal correspondence between beta-band rhythm and  $1/f$  slope  
364 indicates that the stronger beta-band power reduction in the somatomotor cortex contralateral to  
365 the selected arm is associated with a relative disinhibition of somatomotor neuronal populations.  
366 This inference is supported and generalized by the representational similarity analyses of the  
367 temporal and spatial relations between those two spectral indexes evoked during movement  
368 imagery (Figure 3D-F). These analyses indicate that there is a robust spatiotemporal similarity  
369 across different imagined movements between beta-band power and  $1/f$  slope, over and above the  
370 within-trial correlations captured in Figure 3A-C.

371 In contrast, the  $1/f$  slope index had a different relationship with alpha-band responses to  
372 task demands. **The putative index of excitation/inhibition balance** was not spatially related to the  
373 alpha-band response (Figure 3B, C), with a 25% correspondence (5/20) between electrodes with  
374 local maxima in alpha-band activity and local inhibition. However, there was a significant temporal  
375 anti-correlation between local maxima of alpha-band power and  $1/f$  slope (Figure 3A). This  
376 observation suggests that the stronger alpha-band power evoked in the somatosensory cortex  
377 ipsilateral to the selected arm (Figure 2E) is associated with a relative but spatially unspecific  
378 inhibition of the sensorimotor cortex. This inference is partially supported by the representational  
379 similarity analyses (Figure 3D-F). Although the trial-by-trial variation in spatiotemporal patterns of  
380 alpha-band power and  $1/f$  slope is significantly related (Figure 3F), there are no clear similarities  
381 between those two spectral indexes when only temporal or spatial profiles are considered (Figure  
382 3D, E).

383

### 384 **Alpha- and beta-band rhythms propagate independently across sensorimotor cortex**

385 The differential relation of alpha- and beta-band rhythms to (dis)inhibition of the sensorimotor  
386 cortex raises the issue of understanding whether that (dis)inhibition is propagated in a consistent  
387 spatiotemporal pattern. This possibility is functionally relevant: It has been suggested that there  
388 are consistent phase relationships among rhythmic cortical signals, organized in sparse traveling

389 waves that could facilitate sequences of activation in proximal-to-distal muscle representations in  
390 preparation for reaching behavior (Ermentrout and Kleinfeld, 2001; Muller et al., 2018). We  
391 explored this possibility by assessing the traveling wave characteristics of ECoG signals filtered at  
392 individual alpha- and beta-band frequencies and examining the functional relationship of those  
393 traveling waves with neuronal ensembles generating alpha and beta rhythms.

394 Visual inspection of single-trial filtered activity indicated that the phase of alpha- and beta-  
395 band signals varied systematically across the electrode array during motor imagery (Figure 4A). To  
396 quantitatively verify that rhythmic activity spatially progressed as traveling waves across  
397 sensorimotor cortex, we estimated spatial gradients of instantaneous rhythm phase computed  
398 using the Hilbert transform at each electrode across the recording array. These spatial gradients  
399 represent distance-weighted phase shifts between cortical signals at neighboring recording  
400 electrodes, where positive phase shifts correspond to signals that have covered a greater distance  
401 along the unit circle and thus lead the oscillation. To test whether the spatial gradients behaved like  
402 propagating waves at the single-trial level, we computed the phase-gradient directionality (PGD), a  
403 measure of the degree of phase-gradient alignment across an electrode array (Rubino et al., 2006).  
404 As seen through the small cone-shaped arrows positioned over each corresponding grid-electrode  
405 in Figure 4A, both alpha and beta phase gradients exhibited a higher degree of alignment across  
406 sensorimotor cortex than expected by chance (mean alpha PGD = 0.37, mean beta PGD = 0.35,  $p <$   
407  $0.001$  in each patient for both alpha and beta, estimated from shuffled data). The traveling waves  
408 moved in a consistent direction across trials and over trial-time (circular histograms in Figure 4A;  
409 Rayleigh test of uniformity,  $p < 10^{-18}$  in 5 out of 6 patients for alpha,  $p < 10^{-91}$  in each patient for  
410 beta). Across participants, mean propagation speeds of the sensorimotor waves ranged between 5  
411 and 9 cm/s for alpha and between 11 and 21 cm/s for beta (Figure 4B), consistent with previous  
412 reports of traveling beta waves in motor cortex (Rubino et al., 2006) and in the lower range of  
413 traveling alpha waves observed in posterior cortex (Bahramisharif et al., 2013; Halgren et al., 2017;  
414 Zhang et al., 2018). These observations corroborate and extend previous studies by showing that  
415 both alpha- and beta-band rhythms are organized in waves traveling across the sensorimotor  
416 cortex (Halgren et al., 2017; Takahashi et al., 2015; Zhang et al., 2018).

417 A novel finding of this study is that alpha and beta traveling waves propagate independently  
418 across sensorimotor cortex, as indicated by the distribution of propagation directions in individual  
419 participants (Figure 4A, Movies S1, S2) and by the mean probability distribution over participants  
420 (Figure 4C; mean Kullback-Leibler divergence = 0.10,  $p < 0.001$  in each patient, estimated from  
421 shuffled data). Alpha waves propagated in a caudo-rostral direction, while beta waves advanced in

422 a rostro-caudal direction (Figure 4C, Figure S6). This analysis also revealed that electrodes  
423 sampling alpha- or beta-band rhythms with larger amplitudes were not sources or sinks of the  
424 alpha- or beta-traveling waves: Previously identified local maxima in alpha- and beta-band activity  
425 did not have a systematic phase advantage or delay in relation to other electrodes across the  
426 sensorimotor cortex (Figure 4A). Nevertheless, traveling-wave-like activity at these cortical sites  
427 was task-relevant, as indicated by an increase in directional consistency (DC) of those waves during  
428 movement imagery. Directional consistency measures the degree of consistency across trials in the  
429 phase-gradient direction (Zhang et al., 2018). As seen in Figure 4D, alpha rhythms propagated in a  
430 more consistent direction during imagined movement of the ipsilateral hand, while the propagation  
431 direction of beta rhythms became more consistent during imagined movement of the contralateral  
432 hand, as compared to baseline levels (see Figure S7 for the effects of task demand). Together, these  
433 observations indicate that the broader spatiotemporal context in which rhythmic cortical signals  
434 are embedded constitute an important component of movement selection, as indexed through  
435 motor imagery, and that this spatiotemporal organization differs for alpha and beta rhythms.

436  
437  
438  
439  
440  
441  
442  
443  
444  
445  
446  
447



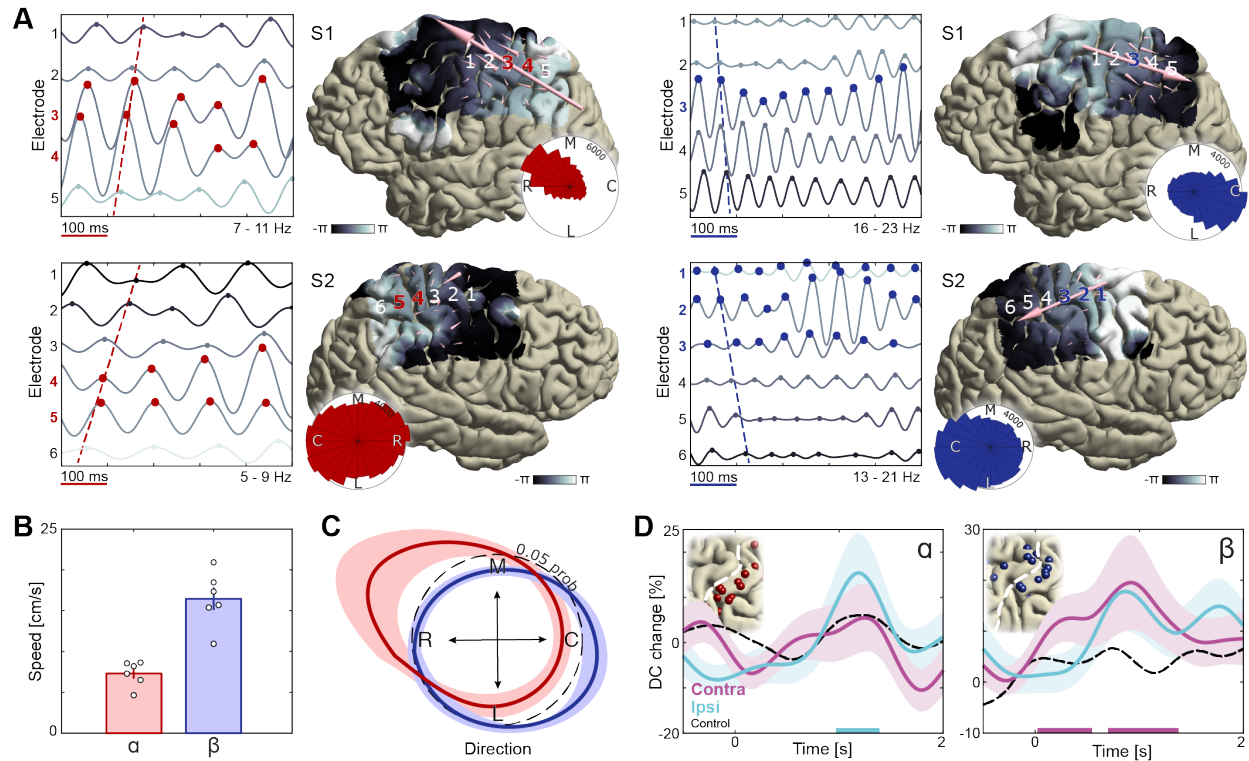

448

449 **Figure 4.** Dissociation of sensorimotor alpha and beta traveling waves. **(A)** Propagation of alpha and beta  
 450 rhythmic activity during imagined movement in two representative individuals. Example cortical signals are  
 451 of the same data segment in each participant but filtered at individual alpha and beta frequencies. Red and  
 452 blue markers indicate electrodes previously identified as alpha- and beta-band local maxima, respectively.  
 453 Cortical phase maps indicate the average phase at each cortical site relative to a central sensorimotor  
 454 reference electrode. Small cone-shaped arrows indicate the mean propagation direction at each stimulation-  
 455 positive electrode, with arrow size weighted by the local phase gradient magnitude. Large arrows indicate the  
 456 mean propagation direction across sensorimotor cortex, with arrow size weighted by the alignment of  
 457 sensorimotor gradients (phase gradient directionality, PGD). **(B)** Mean propagation speeds of traveling alpha  
 458 and beta waves over participants. **(C)** Mean probability distribution of traveling wave direction over  
 459 participants. Alpha rhythm propagation is maximal in a caudo-rostral direction (red distribution), while beta  
 460 rhythms predominantly moved in a rostro-caudal direction (blue distribution). Dashed black circle  
 461 represents a uniform distribution of propagation directions, for reference. **(D)** Alpha traveling waves  
 462 propagated more consistently through alpha-band local maxima during imagined movement of the ipsilateral  
 463 hand (directional consistency, DC). In contrast, beta waves traveled more consistently through beta-band  
 464 local maxima during imagined movement of the contralateral hand. Colored bars along the x-axes indicate  
 465 time intervals of statistically significant DC changes from baseline levels for the effector involved in the  
 466 imagined movement.

## 467 Discussion

468 This ECoG study qualifies the spatiotemporal dynamics of alpha- and beta-band rhythms  
469 and their effects on the local excitability of sensorimotor neuronal ensembles during movement  
470 selection, in the context of a psychophysically-controlled motor imagery task. Rhythmic signals in  
471 the alpha- and beta-band were prominent in the patients' sensorimotor cortex, sustained across  
472 each trial, motorically relevant, and organized in spatially consistent waves of phase relationships  
473 traveling along opposite directions. In line with previous reports (Brinkman et al., 2014; Crone et  
474 al., 1998; de Lange et al., 2008; Miller et al., 2010), this study shows that the power envelopes of  
475 those two rhythms differentiated between imagined movements involving the contralateral or the  
476 ipsilateral hand. This study also confirms historical accounts by showing that alpha- and beta-band  
477 rhythms arise from anatomically and functionally distinct neuronal ensembles (Berger, 1938;  
478 Jasper and Penfield, 1949; Salmelin and Hari, 1994). Local maxima of alpha-band power were  
479 distributed on the postcentral gyrus, and electrical stimulation of those electrodes yielded  
480 somatosensory sensations of the upper limb. Sensorimotor beta was strongest at electrodes placed  
481 over the central sulcus, with electrical stimulation yielding both movements and somatosensory  
482 sensations. This study provides a novel piece of empirical evidence showing that sensorimotor  
483 alpha and beta rhythms have different neurophysiological properties, (dis)inhibiting different  
484 sensorimotor neuronal ensembles and dissociable functional components of movement selection.  
485 Namely, beta rhythmic activity closely tracked task-related modulations of the  $1/f$  slope of the  
486 power-spectrum, an index of excitation/inhibition balance (Gao et al., 2017). The relation between  
487 beta and  $1/f$  slope held across the spatial extent of the sensorimotor cortex, and within trials as well  
488 as across trials. When the  $1/f$  slope transiently increased in somatomotor cortex during movement  
489 imagery, indicating a shift in balance from relative inhibition to excitation, beta rhythmic activity  
490 showed a focal reduction in signal strength. These findings suggest that imagery-related reduction  
491 in beta-band power, predominant over the somatomotor cortex contralateral to the selected arm, is  
492 associated with a relative disinhibition of somatomotor neuronal populations. This beta-band  
493 movement-related disinhibition was embedded within traveling waves moving along a rostro-  
494 caudal direction across the fronto-parietal cortex. There was also a relative increase in alpha-band  
495 power in the somatosensory cortex ipsilateral to the selected arm, an effect that was associated  
496 with a spatially unspecific inhibition of the sensorimotor cortex. This alpha-band inhibition was  
497 embedded within traveling waves along a caudo-rostral direction across the parieto-frontal cortex.  
498 We draw two main conclusions from these human neurophysiological observations. First, the  
499 evidence points to the relevance of both disinhibition and inhibition mechanisms for precise

500 spatiotemporal coordination of movement-related neuronal populations. Second, the evidence  
501 points to the dramatically different neurophysiological properties of sensorimotor alpha and beta  
502 rhythms, questioning the practice of aggregating those rhythms when studying cerebral function.

503         These findings emphasize how increased excitability of the sensorimotor cortex goes hand  
504 in hand with increased (and spatially widespread) inhibition. Speculatively, the spatiotemporal  
505 profile of increased excitability observed in the contralateral sensorimotor cortex might support  
506 the coordination of multiple sensorimotor cortical ensembles toward a movement-effective neural  
507 subspace (Elsayed et al., 2016; Shenoy et al., 2013), possibly implemented as dynamic modulations  
508 in direction- and frequency-dependent spatial arrangements of neuron receptor fields (Heitmann et  
509 al., 2013). Accordingly, beta waves in the motor cortex carry most movement-related information  
510 during the preparatory phase of a movement (Rubino et al., 2006). In contrast, the spatially  
511 unspecific inhibition of the ipsilateral sensorimotor cortex suggests that movement selection also  
512 requires suppression of task-irrelevant movements and in particular inhibition of their  
513 somatosensory correlates. It seems unlikely that this inhibitory effect was driven by somatosensory  
514 attention to the hand used during imagery since there were no lateralized power changes in the  
515 prestimulus baseline period, during which participants knew which hand they would use.

516

### 517 **Interpretational issues**

518 Previous micro-ECoG studies in non-human primates have shown systematic phase relationships  
519 between motor cortical signals less than a millimeter apart (Rubino et al., 2006; Takahashi et al.,  
520 2015). Here, we add to those findings by showing that alpha- and beta-band traveling waves  
521 propagate across the human sensorimotor cortex, independently. High-density laminar recordings  
522 of alpha and beta rhythmic activity might be able to test whether those rhythms propagate through  
523 different cortical layers (van Kerkoerle et al., 2014). Another possibility is that different cortico-  
524 thalamo-cortical and cortico-striatal-thalamo-cortical circuits lead to different alpha and beta  
525 traveling waves across the sensorimotor cortex (Bastos et al., 2014; Schreckenberger et al., 2004;  
526 West et al., 2018). The latter possibility could accommodate the observation that sources/sinks of  
527 the traveling waves were independent from electrodes sampling rhythms with larger amplitudes,  
528 and that there were no obvious phase-shifts between neighboring electrodes spanning a cortical  
529 fold. Large-scale corticothalamic recordings of alpha and beta waves might be able to define the  
530 precise mechanisms supporting those traveling waves over human sensorimotor cortex (Halgren et  
531 al., 2017).

532 Alpha- and beta-band rhythms are embedded within (but physiologically different from)  
533 arrhythmic broadband  $1/f$  components of the signal, and their spectral distributions differ between  
534 individuals (a case in point is participant S7 lacking a rhythmic component in the alpha frequency  
535 range). Supplementary analyses indicate that ignoring those facts, as standard analytical pipelines  
536 do, led to strong but spurious correlation between alpha and beta power envelopes. Furthermore,  
537 the spatial differentiation between alpha- and beta-band cortical sources might prove too subtle for  
538 many non-invasive electrophysiological recordings (Brinkman et al., 2014; Fransen et al., 2016).  
539 These considerations might help to understand why those two sensorimotor rhythms are often  
540 aggregated into the same ( $\mu$ -) rhythm category (Cuevas et al., 2014; Hari, 2006). Having shown  
541 that those two rhythms are anatomically and functionally distinct phenomena, it becomes relevant  
542 to know whether alpha and beta rhythms can also be systematically differentiated in other frontal  
543 brain regions (Bastos et al., 2018; Johnston et al., 2019).

544

#### 545 **Conclusions**

546 The current findings indicate that alpha- and beta-band rhythms, besides having different  
547 anatomical distributions and traveling along opposite directions across the sensorimotor cortex,  
548 have different effects on cortical excitability. Increased alpha rhythmic activity in the  
549 somatosensory cortex ipsilateral to the selected arm is associated with spatially-unspecific cortical  
550 inhibition, whereas a reduction in beta rhythmic activity over contralateral motor cortex is  
551 associated with a spatially-focal shift in excitation/inhibition balance toward excitation. These  
552 findings increase our understanding of how cortical rhythms can mechanistically support the  
553 precise spatiotemporal organization of neuronal ensembles necessary for coordinating complex  
554 movements in humans.

## 555 **Materials and methods**

### 556 **Participants**

557 Eleven participants (7 males, 14 - 45 y of age) were implanted subdurally with grid and strip  
558 electrode arrays on the cortical surface to localize the seizure onset zone for subsequent surgical  
559 resection (Figure 1A). The electrode arrays (10 mm inter-electrode spacing, 2.3 mm exposed  
560 diameter; Ad-Tech, Racine, USA) were placed at the University Medical Center Utrecht, The  
561 Netherlands, on either right or left (8 cases) hemisphere. The number and anatomical location of  
562 the electrodes varied across participants, depending on the clinical considerations specific to each  
563 case (mean number of electrodes  $\pm$  SEM:  $81.3 \pm 11.2$ ). The sample size was determined by the  
564 availability of participants with (partial) electrode coverage of the central sulcus during the funding  
565 period of the project (four years). All participants had normal hearing and normal vision, and gave  
566 informed consent according to institutional guidelines of the local ethics committee (Medical  
567 Ethical Committee of the University Medical Center Utrecht), in accordance with the declaration of  
568 Helsinki. No seizures occurred during task administration. Two participants had difficulties  
569 adhering to the task instructions and frequently confused left- and right-hand conditions of the  
570 study. One of these participants had cavernous malformations in temporoparietal and frontal  
571 cortex. The other participant had experienced medical complications prior to task performance,  
572 leaving nine participants for analysis of the behavioral data. Two participants had no electrode  
573 coverage of upper-limb sensorimotor areas as indicated by electrocortical stimulation, leaving  
574 seven participants for analysis of the neural data.

575

### 576 **Movement imagery task**

577 Participants were positioned in a semi-recumbent position in their hospital bed and performed up  
578 to three sessions of a movement selection task (mean number of sessions  $\pm$  SEM:  $2 \pm 0.2$ ). In this  
579 task, participants imagined grasping the middle-third of a black-white cylinder with either their left  
580 or right hand (Figure 1B). The cylinder, tilted according to 1 of 15 possible orientations ( $24^\circ$  apart,  
581 presented pseudo-randomly, size 17.5 x 3.5 cm), was presented on a gray background at the center  
582 of the computer screen that was placed within reaching distance in front of the participant. The  
583 duration for which the cylinder stayed on the screen was adjusted for each participant (2 - 5 sec)  
584 such that they could comfortably perform the task at a pace that suited their current physical and  
585 mental state. Next, a response screen appeared where the participants indicated whether their  
586 thumb was on the black or the white part of the cylinder at the end of the imagined movement. The  
587 response screen consisted of two squares on the horizontal plane (one black and one white), where

588 participants indicated 'black' or 'white' by pressing the corresponding button (left or right button)  
589 using the left or right thumb on a button box that they held with both hands. The order of the  
590 squares (black - left, white - right, or vice versa) was pseudo-random across trials to prevent the  
591 preparation of a response during the simulation of the grasping movements. After the response, a  
592 fixation cross appeared on the screen for 3 to 4 seconds (drawn randomly from a uniform  
593 distribution), after which the next trial started (intertrial interval). A single session consisted of 60  
594 trials (10 minutes). The hand used to imagine the movement alternated every ten trials, prompted  
595 by a visual cue. The task exploited the fact that certain cylinder orientations afforded both  
596 overhand and underhand grasping, whereas other orientations afforded grasping in a single  
597 manner only, due to biomechanical constraints of the hand (Figure 1C). This task manipulation  
598 provided a test of participants' imagery performance as to whether their preferred manner for  
599 grasping the cylinder (thumb on black or white part) was modulated by biomechanical constraints,  
600 varying as a function of cylinder orientation and differing for the left and right hand.

601         Eight out of nine participants whose behavioral data are reported (5 out of 6 participants  
602 whose neural data are reported), completed a control task that used the same visual input and  
603 response contingencies, but where no imagery was required. In the control task, participants  
604 reported which side of the black-white cylinder was larger. That is, the surface areas differed  
605 slightly across trials, e.g., 54% black and 46% white, or vice versa. This allowed controlling for  
606 neural changes unrelated to the movement imagery process, such as those evoked by visual input  
607 during task performance.

608

### 609 **ECoG acquisition and analysis**

610 Electrophysiological data were acquired using the 128-channel Micromed recording system  
611 (Treviso, Italy, 22 bits), analog-filtered between 0.15 and 134.4 Hz, and digitally sampled at 512 Hz.  
612 During the recordings, participants were closely monitored for overt movements or distracting  
613 events. Epochs where these occurred were excluded from the analysis ( $6 \pm 2\%$  of the total amount of  
614 trials). Anatomical images were acquired using preoperative T1-weighted Magnetic Resonance  
615 Imaging (MRI, Philips 3T Achieva; Best, The Netherlands) and post-implantation Computerized  
616 Tomography (CT, Philips Tomoscan SR7000).

617         Data were analyzed using the open-source FieldTrip toolbox (Oostenveld et al., 2011),  
618 performing an integrated analysis of anatomical and electrophysiological human intracranial data.  
619 The procedure for the precise anatomical registration of the electrophysiological signal in each  
620 patient is described in detail elsewhere (Stolk et al., 2018). In brief, electrode locations in relation to

621 the brain's anatomy and the electrophysiological signal were obtained through identification of the  
622 electrodes in a post-implantation CT fused with the preoperative MRI. To correct for any  
623 displacement following implantation, the electrodes were projected to individually rendered  
624 neocortical surfaces along the local norm vector of the electrode grid (Hermes et al., 2010). We used  
625 FreeSurfer to extract anatomically realistic neocortical surfaces from each participant's MRI (Dale  
626 et al., 1999). FreeSurfer also allows registering the surfaces to a template brain on the basis of their  
627 cortical gyrification patterns (Greve et al., 2013). Using these surface registrations, we linked the  
628 electrodes from all participants to their template homologs, preserving the spatial relationship  
629 between cortical folding and electrode positions in each participant. This allowed for anatomically  
630 accurate comparison of local maxima in neural activity across participants.

631 The electrophysiological signals were visually inspected to ensure that they were free of  
632 epileptic activity or other artifacts ( $2 \pm 2\%$  of the total amount of trials excluded). Next, the data  
633 were digitally filtered (1 - 200 Hz bandpass, Butterworth, zero-phase forward and reverse),  
634 removed from power line noise components (50 Hz and harmonic band stop), and re-referenced to  
635 the common average of all channels to remove global noise shared across all channels from the  
636 potential in each channel. **This produced reference-free cortical signals.** We focused the analysis on  
637 the trial epochs during which the participants selected and imagined a movement, preceded by the  
638 appearance of the black-white cylinder. Using time-resolved Fourier analysis, we calculated  
639 spectral power with 1000 ms rolling Hanning-tapered windows at 50 ms increments. This  
640 produced time-frequency estimates up to 200 Hz with a 1 Hz spectral and a 20 Hz temporal  
641 resolution. Inter-session offsets in absolute spectral power were compensated for using linear  
642 regression analysis considering mean power across all time-frequency estimates in a session. For  
643 temporal dynamics analysis, the spectral data were expressed as percentage changes from  
644 bootstrapped spectral power during a pre-cylinder baseline interval (-750 to -500 ms to cylinder  
645 onset) and resampled to identical duration across participants (2 sec, after anti-aliasing).  
646 Differences in spectral power between the left- and right-hand conditions were evaluated using  
647 nonparametric cluster-based permutation statistics (two-sided dependent samples *t*-tests,  $p < 0.05$ ,  
648 10,000 randomizations (Maris and Oostenveld, 2007)), considering electrodes containing local  
649 maxima in neural activity as the unit of observation.

650

### 651 **Spectral features extraction from sensorimotor cortex**

652 Alpha and beta spectral and anatomical distributions were defined on a participant-by-participant  
653 basis, using a four-step procedure. First, electrodes covering cortical regions supporting

654 sensorimotor components of movement were identified using Electrocortical Stimulation Mapping  
655 (ESM, Micromed IRES 600CH), a standard clinical practice involving the pairwise electrical  
656 stimulation of adjacent cortical electrodes (typically at 50 Hz for 1 - 2 sec, with a 0.2 - 0.5 ms pulse  
657 duration and 1 - 4 mA intensity). Intensity of the stimulation was individually tailored, maximizing  
658 effect size while minimizing the occurrence of after-discharges. For each participant, we selected  
659 electrodes that were part of a stimulation electrode pair yielding motor or somatosensory  
660 responses of the upper limb contralateral to the cortical grid (twitches, movements, tingling of  
661 either fingers, hand, wrist, arm or shoulder).

662 Second, we used irregular-resampling auto-spectral analysis (IRASA, (Wen and Liu, 2015)) of  
663 the signal recorded at the stimulation-positive electrodes, allowing distinguishing rhythmic activity  
664 from concurrent power-spectral  $1/f$  modulations. This technique virtually compresses and expands  
665 the time-domain data with a set of non-integer resampling factors prior to Fourier-based spectral  
666 decomposition, redistributing rhythmic components in the power-spectrum while leaving the  
667 arrhythmic  $1/f$  distribution intact. Taking the median of the resulting auto-spectral distributions  
668 extracts the power-spectral  $1/f$  component, and the subsequent removal of the  $1/f$  component from  
669 the original power-spectrum offers a power-spectral estimate of rhythmic content in the recorded  
670 signal. It should be noted that the extracted spectral components no longer contain phase  
671 information and that their estimated magnitudes are susceptible to any phase relationships  
672 between the two components, as indicated by Equation 9 in the original paper (cf. two opposite-  
673 phase oscillations canceling out one another in the summed signal). As a consequence, power in the  
674 rhythmic component is negative at frequencies where the arrhythmic  $1/f$  component exceeds  
675 power of the original power-spectrum. In cases where this happened (never at spectral peaks), we  
676 set power to zero to accommodate spectral curve fitting with exponential models in the next step.

677 Third, mean and full-width at half-maximum of alpha and beta spectral distributions were  
678 defined for each participant using a two-term or three-term Gaussian model, depending on the  
679 presence of a third low-frequency phenomenon in the rhythmic component of the power-spectrum  
680 (<5 Hz in two subjects, see power-spectra in Figure S1). This adaptive approach (Supplemental  
681 Data) avoids having to rely on canonical frequency bands that due in part to their narrowness may  
682 not accurately capture the neural phenomena of interest in each individual (Haegens et al., 2014;  
683 Szurhaj et al., 2003). On average, alpha and beta rhythmic activity were centered on  $7.4 \pm 0.7$  and  
684  $16.9 \pm 1.1$  Hz, respectively. High-frequency neural activity was defined as activity within a broad 60  
685 - 120 Hz range (Lachaux et al., 2012). Because of its hypothesized relationship with non-oscillatory  
686 population-level firing rate (Manning et al., 2009; Miller et al., 2009; Ray and Maunsell, 2011), we



687 estimated high-frequency activity using the arrhythmic  $1/f$  component obtained above (see also  
688 Figure S5 for an empirical argument). We additionally considered the slope of the arrhythmic  $1/f$   
689 component, in log-log space. Computational modeling and local field potential recordings from rat  
690 hippocampus suggest that the slope between 30 and 50 Hz is a power-spectral correlate of synaptic  
691 excitation/inhibition balance, such that a steeper slope corresponds to greater inhibition in a  
692 neuronal ensemble measured by the recording electrode. Notably, electrocorticography recordings  
693 in the non-human primate brain indicate that the  $1/f$  slope closely tracks the increase of inhibition  
694 induced by propofol across space and time (Gao et al., 2017). **Furthermore, recent intracranial**  
695 **recordings in humans find that the slope between 30 and 50 Hz best predicts the depth of sleep and**  
696 **anesthesia, more so than slow oscillatory power** (Lendner et al., n.d.). We here assessed this  
697 measure's potential for capturing movement initiation and suppression in human sensorimotor  
698 cortex. **Linear fits were used to estimate the steepness of the slope in the 30 - 50 Hz range (mean  $R^2$**   
699 **across all slope fits in each individual =  $0.95 \pm 0.00$ ).**

700 Fourth, for a fine-grained anatomical characterization, we localized all four sensorimotor  
701 neuronal phenomena (alpha and beta rhythmic activity, high-frequency arrhythmic activity, and the  
702  $1/f$  slope) by selecting electrodes that exceeded the upper limit of the 99% confidence interval for  
703 absolute spectral power in the respective frequency band across all stimulation-positive electrodes  
704 defined by the first step (for the  $1/f$  slope we used the lower limit of the confidence interval). This  
705 analysis yielded  $4 \pm 1.2$  alpha,  $3.4 \pm 0.8$  beta,  $4.4 \pm 0.7$  high-frequency, and  $5.6 \pm 1.4$   $1/f$  slope local  
706 maxima in sensorimotor cortex for participants S1 - 5. Due to limited sensorimotor coverage, the  
707 number of electrodes could not be narrowed down for participant S6, and all four stimulation-  
708 positive electrodes were considered for further analysis involving temporal dynamics. Participant  
709 S7 lacked a rhythmic power-spectral component in the alpha frequency range and was excluded  
710 from further analysis.

711 We used chi-squared tests of electrode anatomical location and electrical stimulation  
712 response type to assess differential basic sensorimotor properties of alpha and beta rhythms.  
713 Anatomical location was defined as the electrode's spatial relationship to the central sulcus (pre vs.  
714 postcentral sulcus), and response type as the sensorimotor nature of the evoked response following  
715 electrical stimulation (motor response vs. somatosensory sensation).

716

### 717 **Spatiotemporal relations between spectral features**

718 To assess whether sensorimotor alpha, beta, high-frequency activity, and the  $1/f$  slope shared  
719 features during task performance, we performed a correlation analysis of their activity patterns

720 across time, space, as well as time and space combined. First, within-trial correlations of activity  
721 dynamics between -750 and 2000 ms (relative to the onset of the visual stimulus) quantified the  
722 temporal similarity between the four spectral features. These temporal correlations considered, for  
723 each participant, mean activity across local maxima of each spectral feature (as identified with the  
724 procedure described above). Each pair of spectral features produced a single correlation value per  
725 trial. Second, a similar procedure was used to assess whether those spectral features involved  
726 spatially overlapping or distinct neuronal ensembles across sensorimotor cortex. We considered  
727 within-trial correlations of cortical activity patterns across stimulation-positive electrodes. In  
728 contrast to temporal correlation, spatial correlation considered the mean activity per electrode  
729 within a trial (converted into a vector), from visual stimulus presentation onset until the end of the  
730 movement imagery interval (0 to 2000 ms). A third correlation analysis quantified the similarity of  
731 spatiotemporal activity patterns across all stimulation-positive electrodes during a trial (-750 to  
732 2000 ms). Group-level analysis considered the average correlation in each participant, where the  
733 reliability of these correlations across the sample population was assessed using one-sample *t*-  
734 tests. We report Bayes Factors ( $BF_{01}$ ) for statistical tests evaluating evidence in favor of the null  
735 hypothesis. Bayes Factors express the relative likelihood of the data under the models at hand and  
736 were calculated using the JASP statistical software package (JASP Team, [jasp-stats.org](http://jasp-stats.org)).

737 To assess whether the different neural phenomena were sensitive to the same sensorimotor  
738 demands across individual movements, we performed representational similarity analysis on  
739 temporal, spatial, and spatiotemporal activity patterns (Kriegeskorte, 2008). Instead of calculating  
740 correlations between the neural phenomena directly, this approach calculates the similarity in  
741 activity patterns between all possible trial combinations, resulting in a neural similarity matrix for  
742 each phenomenon with as many rows and columns as there are trials. Given that the bottom-left  
743 and top-right entries are identical in these matrices, we extracted only the top right entries  
744 excluding the diagonals containing auto-correlations and converted these entries into vectors. Next,  
745 second-order (Spearman) correlations of these trial-by-trial representational similarity vectors  
746 quantified the similarity in sensitivity to sensorimotor demands between all combinations of neural  
747 phenomena. This approach abstracts away from the activity patterns themselves such that  
748 similarities in sensitivity to sensorimotor demands across different movements between  
749 temporally or spatially non-overlapping neural phenomena can still be revealed. As above, the  
750 reliability of these representational similarities across the sample population was assessed using  
751 one-sample *t*-tests.

752

## 753 **Traveling wave analysis**

754 Alpha and beta traveling waves were identified as cortical signals showing systematic phase  
755 variation across the electrode array (Ermentrout and Kleinfeld, 2001; Muller et al., 2018). We  
756 filtered the time-domain data with a two-pass third-order zero-phase shift Butterworth at  
757 individual alpha and beta frequency ranges determined using the four-step procedure outlined  
758 above. We applied the Hilbert transform to extract the instantaneous phase of ongoing rhythmic  
759 activity at each electrode and estimated for each instance of time (every ~2 ms) the spatial phase  
760 gradient across the recording array. These spatial gradients represent distance-weighted phase  
761 shifts between cortical signals at neighboring recording electrodes, where positive phase shifts  
762 correspond to signals that have covered a greater distance along the unit circle and thus lead the  
763 oscillation (Berens, 2009). To quantify traveling wave direction and velocities along the cortical  
764 sheet, we projected and interpolated the phase data onto a two-dimensional plane defined by the  
765 first two principal axes of the electrode array. This approach facilitates visualization and  
766 interpretation of the subsequent gradient data and allows aggregating non-equidistant electrodes  
767 from adjacent grid and strip arrays. Wave directionality was then found by calculating the angle  
768 between spatial gradients estimated in both principal directions (1 cm in each direction). Wave  
769 velocity was found by the ratio between the mean frequency of the rhythm and gradient magnitude.  
770 **To visualize the mean spatial progression of rhythmic activity across the electrode array, we**  
771 **subtracted the instantaneous phase at a central sensorimotor reference electrode from each**  
772 **electrode before averaging across trials and trial-time.** We visualized the sample mean traveling  
773 wave direction by projecting and averaging over each participant's probability distribution of  
774 traveling wave directions onto the brain sagittal plane.

775 To assess whether the sensorimotor spatial gradients behaved like propagating waves at  
776 the single-trial level, we computed the phase-gradient directionality (PGD) across all stimulation-  
777 positive electrodes. PGD measures the degree of phase gradient alignment across an electrode  
778 array, taking a range of values between 0 and 1, and is found by the ratio between the norm of the  
779 mean spatial gradient and the mean gradient norm across the array (Rubino et al., 2006). **We**  
780 **assessed the reliability of the propagating waves by finding the mean PGD across trials and trial-**  
781 **time and then comparing this value with two separate distributions of PGDs estimated from**  
782 **randomly permuted time-points and randomly permuted electrode locations within the array. The**  
783 **former redistributes activity over time, preserving the spatial structure of activity in sensorimotor**  
784 **cortex, whereas the latter redistributes activity over space, preserving the temporal structure of**  
785 **activity in a trial.** Rayleigh tests of uniformity were used to determine whether the traveling

786 sensorimotor waves moved in a consistent direction across trials and trial-time (Fisher, 1995). To  
787 assess the consistency of wave propagation direction at a given time and electrode, we computed  
788 the directional consistency (DC). DC measures the degree of consistency in phase gradient  
789 direction, taking a range of values between 0 and 1, and is found by the mean resultant vector  
790 length across trials (Zhang et al., 2018).

791

792

793 **Author contributions**

794 A.S., L.B., F.P.L, and I.T. conceived and designed the study. L.B. conducted the study and collected the  
795 data. A.S., L.B., and I.T. conducted the data analyses and drafted the manuscript. M.V., E.A., F.S.S.L.,  
796 C.H.D., R.T.K, and F.P.L. provided critical revisions. All authors approved the final version of the  
797 manuscript.

798

799 **Data and code availability**

800 Analysis code for spectral features extraction from the electrophysiological data are published as  
801 supplementary data.

802

803 **Acknowledgments**

804 The authors thank the patients and their families for their participation and A. Bastos, C. W. Hoy,  
805 and R. Oostenveld for invaluable discussions and comments on previous versions of this article. A.S.  
806 was supported by Rubicon grant 446-14-007 from NWO and Marie Skłodowska-Curie Global  
807 Fellowship 658868 from the European Union. L.B. was supported by Brain and Cognition grant  
808 433-09-248 from NWO awarded to I.T.

## 809 REFERENCES

- 810 Alayrangues J, Torrecillos F, Jahani A, Malfait N. 2019. Error-related modulations of the  
811 sensorimotor post-movement and foreperiod beta-band activities arise from distinct neural  
812 substrates and do not reflect efferent signal processing. *Neuroimage* **184**:10–24.
- 813 Bahramisharif A, van Gerven MAJ, Aarnoutse EJ, Mercier MR, Schwartz TH, Foxe JJ, Ramsey NF,  
814 Jensen O. 2013. Propagating neocortical gamma bursts are coordinated by traveling alpha  
815 waves. *J Neurosci* **33**:18849–18854.
- 816 Baker SN, Olivier E, Lemon RN. 1997. Coherent oscillations in monkey motor cortex and hand  
817 muscle EMG show task-dependent modulation. *J Physiol* **501 ( Pt 1)**:225–241.
- 818 Bastos AM, Briggs F, Alitto HJ, Mangun GR, Usrey WM. 2014. Simultaneous recordings from the  
819 primary visual cortex and lateral geniculate nucleus reveal rhythmic interactions and a cortical  
820 source for  $\gamma$ -band oscillations. *J Neurosci* **34**:7639–7644.
- 821 Bastos AM, Loonis R, Kornblith S, Lundqvist M, Miller EK. 2018. Laminar recordings in frontal  
822 cortex suggest distinct layers for maintenance and control of working memory. *Proc Natl Acad*  
823 *Sci U S A* **115**:1117–1122.
- 824 Berens P. 2009. CircStat: AMATLABToolbox for Circular Statistics. *J Stat Softw* **31**.  
825 doi:10.18637/jss.v031.i10
- 826 Berger H. 1938. Über das Elektrenkephalogramm des Menschen. *Archiv für Psychiatrie und*  
827 *Nervenkrankheiten*. doi:10.1007/bf01824101
- 828 Bressler SL, Richter CG. 2015. Interareal oscillatory synchronization in top-down neocortical  
829 processing. *Curr Opin Neurobiol* **31**:62–66.
- 830 Brinkman L, Stolk A, Dijkerman HC, de Lange FP, Toni I. 2014. Distinct roles for alpha- and beta-  
831 band oscillations during mental simulation of goal-directed actions. *J Neurosci* **34**:14783–  
832 14792.
- 833 Brinkman L, Stolk A, Marshall TR, Esterer S, Sharp P, Dijkerman HC, de Lange FP, Toni I. 2016.  
834 Independent Causal Contributions of Alpha- and Beta-Band Oscillations during Movement  
835 Selection. *J Neurosci* **36**:8726–8733.
- 836 Brovelli A, Ding M, Ledberg A, Chen Y, Nakamura R, Bressler SL. 2004. Beta oscillations in a large-  
837 scale sensorimotor cortical network: directional influences revealed by Granger causality. *Proc*  
838 *Natl Acad Sci U S A* **101**:9849–9854.
- 839 Bruno AM, Frost WN, Humphries MD. 2015. Modular deconstruction reveals the dynamical and  
840 physical building blocks of a locomotion motor program. *Neuron* **86**:304–318.
- 841 Carlqvist H, Nikulin VV, Strömberg JO, Brismar T. 2005. Amplitude and phase relationship between  
842 alpha and beta oscillations in the human electroencephalogram. *Med Biol Eng Comput* **43**:599–  
843 607.
- 844 Cisek P, Kalaska JF. 2004. Neural correlates of mental rehearsal in dorsal premotor cortex. *Nature*  
845 **431**:993–996.
- 846 Crone NE, Miglioretti DL, Gordon B, Sieracki JM, Wilson MT, Uematsu S, Lesser RP. 1998. Functional  
847 mapping of human sensorimotor cortex with electrocorticographic spectral analysis. I. Alpha  
848 and beta event-related desynchronization. *Brain* **121 ( Pt 12)**:2271–2299.
- 849 Cuevas K, Cannon EN, Yoo K, Fox NA. 2014. The Infant EEG Mu Rhythm: Methodological  
850 Considerations and Best Practices. *Dev Rev* **34**:26–43.
- 851 Dale AM, Fischl B, Sereno MI. 1999. Cortical surface-based analysis. I. Segmentation and surface  
852 reconstruction. *Neuroimage* **9**:179–194.
- 853 de Lange FP, Helmich RC, Toni I. 2006. Posture influences motor imagery: an fMRI study.  
854 *Neuroimage* **33**:609–617.
- 855 de Lange FP, Jensen O, Bauer M, Toni I. 2008. Interactions between posterior gamma and frontal  
856 alpha/beta oscillations during imagined actions. *Front Hum Neurosci* **2**:7.

- 857 Dombeck DA, Graziano MS, Tank DW. 2009. Functional clustering of neurons in motor cortex  
858 determined by cellular resolution imaging in awake behaving mice. *J Neurosci* **29**:13751–  
859 13760.
- 860 Ebbesen CL, Brecht M. 2017. Motor cortex - to act or not to act? *Nat Rev Neurosci* **18**:694–705.
- 861 Elsayed GF, Lara AH, Kaufman MT, Churchland MM, Cunningham JP. 2016. Reorganization between  
862 preparatory and movement population responses in motor cortex. *Nat Commun* **7**:13239.
- 863 Ermentrout GB, Kleinfeld D. 2001. Traveling electrical waves in cortex: insights from phase  
864 dynamics and speculation on a computational role. *Neuron* **29**:33–44.
- 865 Fisher NI. 1995. Statistical Analysis of Circular Data. Cambridge University Press.
- 866 Fransen AMM, Dimitriadis G, van Ede F, Maris E. 2016. Distinct  $\alpha$ - and  $\beta$ -band rhythms over rat  
867 somatosensory cortex with similar properties as in humans. *J Neurophysiol* **115**:3030–3044.
- 868 Gao R, Peterson EJ, Voytek B. 2017. Inferring synaptic excitation/inhibition balance from field  
869 potentials. *Neuroimage* **158**:70–78.
- 870 Gentili R, Cahouet V, Ballay Y, Papaxanthis C. 2004. Inertial properties of the arm are accurately  
871 predicted during motor imagery. *Behav Brain Res* **155**:231–239.
- 872 Graziano MSA. 2016. Ethological Action Maps: A Paradigm Shift for the Motor Cortex. *Trends Cogn  
873 Sci* **20**:121–132.
- 874 Greenhouse I, Sias A, Labruna L, Ivry RB. 2015. Nonspecific Inhibition of the Motor System during  
875 Response Preparation. *J Neurosci* **35**:10675–10684.
- 876 Greve DN, Van der Haegen L, Cai Q, Stufflebeam S, Sabuncu MR, Fischl B, Brysbaert M. 2013. A  
877 surface-based analysis of language lateralization and cortical asymmetry. *J Cogn Neurosci*  
878 **25**:1477–1492.
- 879 Haegens S, Cousijn H, Wallis G, Harrison PJ, Nobre AC. 2014. Inter- and intra-individual variability in  
880 alpha peak frequency. *Neuroimage* **92**:46–55.
- 881 Halgren M, Ulbert I, Bastuji H, Fabo D, Eross L, Rey M, Devinsky O, Doyle WK, Mak-McCully R,  
882 Halgren E, Wittner L, Chauvel P, Heit G, Eskandar E, Mandell A, Cash SS. 2017. The Generation  
883 and Propagation of the Human Alpha Rhythm. doi:10.1101/202564
- 884 Hari R. 2006. Action-perception connection and the cortical mu rhythm. *Prog Brain Res* **159**:253–  
885 260.
- 886 He BJ. 2014. Scale-free brain activity: past, present, and future. *Trends Cogn Sci* **18**:480–487.
- 887 Heitmann S, Boonstra T, Breakspear M. 2013. A dendritic mechanism for decoding traveling waves:  
888 principles and applications to motor cortex. *PLoS Comput Biol* **9**:e1003260.
- 889 Hermes D, Miller KJ, Noordmans HJ, Vansteensel MJ, Ramsey NF. 2010. Automated  
890 electrocorticographic electrode localization on individually rendered brain surfaces. *J Neurosci  
891 Methods* **185**:293–298.
- 892 Jasper H, Penfield W. 1949. Electrocorticograms in man: Effect of voluntary movement upon the  
893 electrical activity of the precentral gyrus. *Archiv für Psychiatrie und Nervenkrankheiten*  
894 **183**:163–174.
- 895 Johnston K, Ma L, Schaeffer L, Everling S. 2019. Alpha-oscillations modulate preparatory activity in  
896 marmoset area 8Ad. *J Neurosci*. doi:10.1523/JNEUROSCI.2703-18.2019
- 897 Jones SR. 2016. When brain rhythms aren't "rhythmic": implication for their mechanisms and  
898 meaning. *Curr Opin Neurobiol* **40**:72–80.
- 899 Jurkiewicz MT, Gaetz WC, Bostan AC, Cheyne D. 2006. Post-movement beta rebound is generated in  
900 motor cortex: evidence from neuromagnetic recordings. *Neuroimage* **32**:1281–1289.
- 901 Kriegeskorte N. 2008. Representational similarity analysis – connecting the branches of systems  
902 neuroscience. *Front Syst Neurosci*. doi:10.3389/neuro.06.004.2008
- 903 Kriegeskorte N, Goebel R, Bandettini P. 2006. Information-based functional brain mapping. *Proc  
904 Natl Acad Sci U S A* **103**:3863–3868.
- 905 Kühn AA, Doyle L, Pogosyan A, Yarrow K, Kupsch A, Schneider G-H, Hariz MI, Trottenberg T, Brown  
906 P. 2006. Modulation of beta oscillations in the subthalamic area during motor imagery in

- 907            Parkinson's disease. *Brain* **129**:695–706.
- 908    Lachaux J-P, Axmacher N, Mormann F, Halgren E, Crone NE. 2012. High-frequency neural activity  
909            and human cognition: past, present and possible future of intracranial EEG research. *Prog*  
910            *Neurobiol* **98**:279–301.
- 911    Lebon F, Ruffino C, Greenhouse I, Labruna L, Ivry RB, Papaxanthis C. 2019. The Neural Specificity of  
912            Movement Preparation During Actual and Imagined Movements. *Cereb Cortex* **29**:689–700.
- 913    Lendner JD, Helfrich RF, Mander BA, Romundstad L, Lin JJ, Walker MP, Larsson PG, Knight RT. n.d.  
914            An Electrophysiological Marker of Arousal Level in Humans. doi:10.1101/625210
- 915    Leszczynski M, Barczak A, Kajikawa Y, Ulbert I, Falchier A, Tal I, Haegens S, Melloni L, Knight R,  
916            Schroeder C. n.d. Dissociation of broadband high-frequency activity and neuronal firing in the  
917            neocortex. doi:10.1101/531368
- 918    Leventhal DK, Gage GJ, Schmidt R, Pettibone JR, Case AC, Berke JD. 2012. Basal ganglia beta  
919            oscillations accompany cue utilization. *Neuron* **73**:523–536.
- 920    Little S, Bonaiuto J, Barnes G, Bestmann S. n.d. Motor cortical beta transients delay movement  
921            initiation and track errors. doi:10.1101/384370
- 922    Madsen M, Takemi M, Kesselheim J, Tashiro S, Siebner H. 2019. Focal TACS of the primary motor  
923            hand area at individual mu and beta rhythm – effects on cortical excitability. *Brain Stimulation*.  
924            doi:10.1016/j.brs.2018.12.896
- 925    Manning JR, Jacobs J, Fried I, Kahana MJ. 2009. Broadband shifts in local field potential power  
926            spectra are correlated with single-neuron spiking in humans. *J Neurosci* **29**:13613–13620.
- 927    Maris E, Oostenveld R. 2007. Nonparametric statistical testing of EEG- and MEG-data. *J Neurosci*  
928            *Methods* **164**:177–190.
- 929    Miller KJ, Schalk G, Fetz EE, den Nijs M, Ojemann JG, Rao RPN. 2010. Cortical activity during motor  
930            execution, motor imagery, and imagery-based online feedback. *Proc Natl Acad Sci U S A*  
931            **107**:4430–4435.
- 932    Miller KJ, Sorensen LB, Ojemann JG, den Nijs M. 2009. Power-law scaling in the brain surface  
933            electric potential. *PLoS Comput Biol* **5**:e1000609.
- 934    Mima T, Hallett M. 1999. Electroencephalographic analysis of cortico-muscular coherence:  
935            reference effect, volume conduction and generator mechanism. *Clin Neurophysiol* **110**:1892–  
936            1899.
- 937    Mink JW. 1996. The basal ganglia: focused selection and inhibition of competing motor programs.  
938            *Prog Neurobiol* **50**:381–425.
- 939    Muller L, Chavane F, Reynolds J, Sejnowski TJ. 2018. Cortical travelling waves: mechanisms and  
940            computational principles. *Nat Rev Neurosci* **19**:255–268.
- 941    Oostenveld R, Fries P, Maris E, Schoffelen J-M. 2011. FieldTrip: Open source software for advanced  
942            analysis of MEG, EEG, and invasive electrophysiological data. *Comput Intell Neurosci*  
943            **2011**:156869.
- 944    Pfurtscheller G, Berghold A. 1989. Patterns of cortical activation during planning of voluntary  
945            movement. *Electroencephalogr Clin Neurophysiol* **72**:250–258.
- 946    Picazio S, Veniero D, Ponzio V, Caltagirone C, Gross J, Thut G, Koch G. 2014. Prefrontal control over  
947            motor cortex cycles at beta frequency during movement inhibition. *Curr Biol* **24**:2940–2945.
- 948    Ray S, Maunsell JHR. 2011. Different origins of gamma rhythm and high-gamma activity in macaque  
949            visual cortex. *PLoS Biol* **9**:e1000610.
- 950    Rich EL, Wallis JD. 2017. Spatiotemporal dynamics of information encoding revealed in  
951            orbitofrontal high-gamma. *Nat Commun* **8**:1139.
- 952    Rosenbaum DA, Loukopoulos LD, Meulenbroek RG, Vaughan J, Engelbrecht SE. 1995. Planning  
953            reaches by evaluating stored postures. *Psychol Rev* **102**:28–67.
- 954    Rubino D, Robbins KA, Hatsopoulos NG. 2006. Propagating waves mediate information transfer in  
955            the motor cortex. *Nat Neurosci* **9**:1549–1557.
- 956    Saleh M, Reimer J, Penn R, Ojakangas CL, Hatsopoulos NG. 2010. Fast and slow oscillations in human



- 957 primary motor cortex predict oncoming behaviorally relevant cues. *Neuron* **65**:461–471.
- 958 Salmelin R, Hari R. 1994. Characterization of spontaneous MEG rhythms in healthy adults.
- 959 *Electroencephalogr Clin Neurophysiol* **91**:237–248.
- 960 Schreckenberger M, Lange-Asschenfeldt C, Lochmann M, Mann K, Siessmeier T, Buchholz H-G,
- 961 Bartenstein P, Gründer G. 2004. The thalamus as the generator and modulator of EEG alpha
- 962 rhythm: a combined PET/EEG study with lorazepam challenge in humans. *Neuroimage*
- 963 **22**:637–644.
- 964 Shenoy KV, Sahani M, Churchland MM. 2013. Cortical control of arm movements: a dynamical
- 965 systems perspective. *Annu Rev Neurosci* **36**:337–359.
- 966 Stolk A, Griffin S, van der Meij R, Dewar C, Saez I, Lin JJ, Piantoni G, Schoffelen J-M, Knight RT,
- 967 Oostenveld R. 2018. Integrated analysis of anatomical and electrophysiological human
- 968 intracranial data. *Nat Protoc*. doi:10.1038/s41596-018-0009-6
- 969 Szurhaj W, Derambure P, Labyt E, Cassim F, Bourriez J-L, Isnard J, Guieu J-D, Mauguière F. 2003.
- 970 Basic mechanisms of central rhythms reactivity to preparation and execution of a voluntary
- 971 movement: a stereoelectroencephalographic study. *Clin Neurophysiol* **114**:107–119.
- 972 Takahashi K, Kim S, Coleman TP, Brown KA, Suminski AJ, Best MD, Hatsopoulos NG. 2015. Large-
- 973 scale spatiotemporal spike patterning consistent with wave propagation in motor cortex. *Nat*
- 974 *Commun* **6**:7169.
- 975 Tan H, Wade C, Brown P. 2016. Post-Movement Beta Activity in Sensorimotor Cortex Indexes
- 976 Confidence in the Estimations from Internal Models. *J Neurosci* **36**:1516–1528.
- 977 Tiihonen J, Kajola M, Hari R. 1989. Magnetic mu rhythm in man. *Neuroscience*. doi:10.1016/0306-
- 978 4522(89)90299-6
- 979 Toro C, Deuschl G, Thatcher R, Sato S, Kufta C, Hallett M. 1994. Event-related desynchronization and
- 980 movement-related cortical potentials on the ECoG and EEG. *Electroencephalogr Clin*
- 981 *Neurophysiol* **93**:380–389.
- 982 van Elswijk G, Maij F, Schoffelen J-M, Overeem S, Stegeman DF, Fries P. 2010. Corticospinal beta-
- 983 band synchronization entails rhythmic gain modulation. *J Neurosci* **30**:4481–4488.
- 984 van Kerkoerle T, Self MW, Dagnino B, Gariel-Mathis M-A, Poort J, van der Togt C, Roelfsema PR.
- 985 2014. Alpha and gamma oscillations characterize feedback and feedforward processing in
- 986 monkey visual cortex. *Proc Natl Acad Sci U S A* **111**:14332–14341.
- 987 Vansteensel MJ, Bleichner MG, Dintzner LT, Aarnoutse EJ, Leijten FSS, Hermes D, Ramsey NF. 2013.
- 988 Task-free electrocorticography frequency mapping of the motor cortex. *Clin Neurophysiol*
- 989 **124**:1169–1174.
- 990 van Wijk BCM, Beek PJ, Daffertshofer A. 2012. Neural synchrony within the motor system: what
- 991 have we learned so far? *Front Hum Neurosci* **6**:252.
- 992 Vargas CD, Olivier E, Craighero L, Fadiga L, Duhamel JR, Sirigu A. 2004. The Influence of Hand
- 993 Posture on Corticospinal Excitability during Motor Imagery: A Transcranial Magnetic
- 994 Stimulation Study. *Cerebral Cortex*. doi:10.1093/cercor/bhh080
- 995 Wen H, Liu Z. 2015. Separating Fractal and Oscillatory Components in the Power Spectrum of
- 996 Neurophysiological Signal. *Brain Topogr* **29**:13–26.
- 997 West TO, Berthouze L, Halliday DM, Litvak V, Sharott A, Magill PJ, Farmer SF. 2018. Propagation of
- 998 beta/gamma rhythms in the cortico-basal ganglia circuits of the parkinsonian rat. *J*
- 999 *Neurophysiol* **119**:1608–1628.
- 1000 Zhang H, Watrous AJ, Patel A, Jacobs J. 2018. Theta and Alpha Oscillations Are Traveling Waves in
- 1001 the Human Neocortex. *Neuron* **98**:1269–1281.e4.

1002

1003

1004

1005

1006 **Supporting Information**

1007

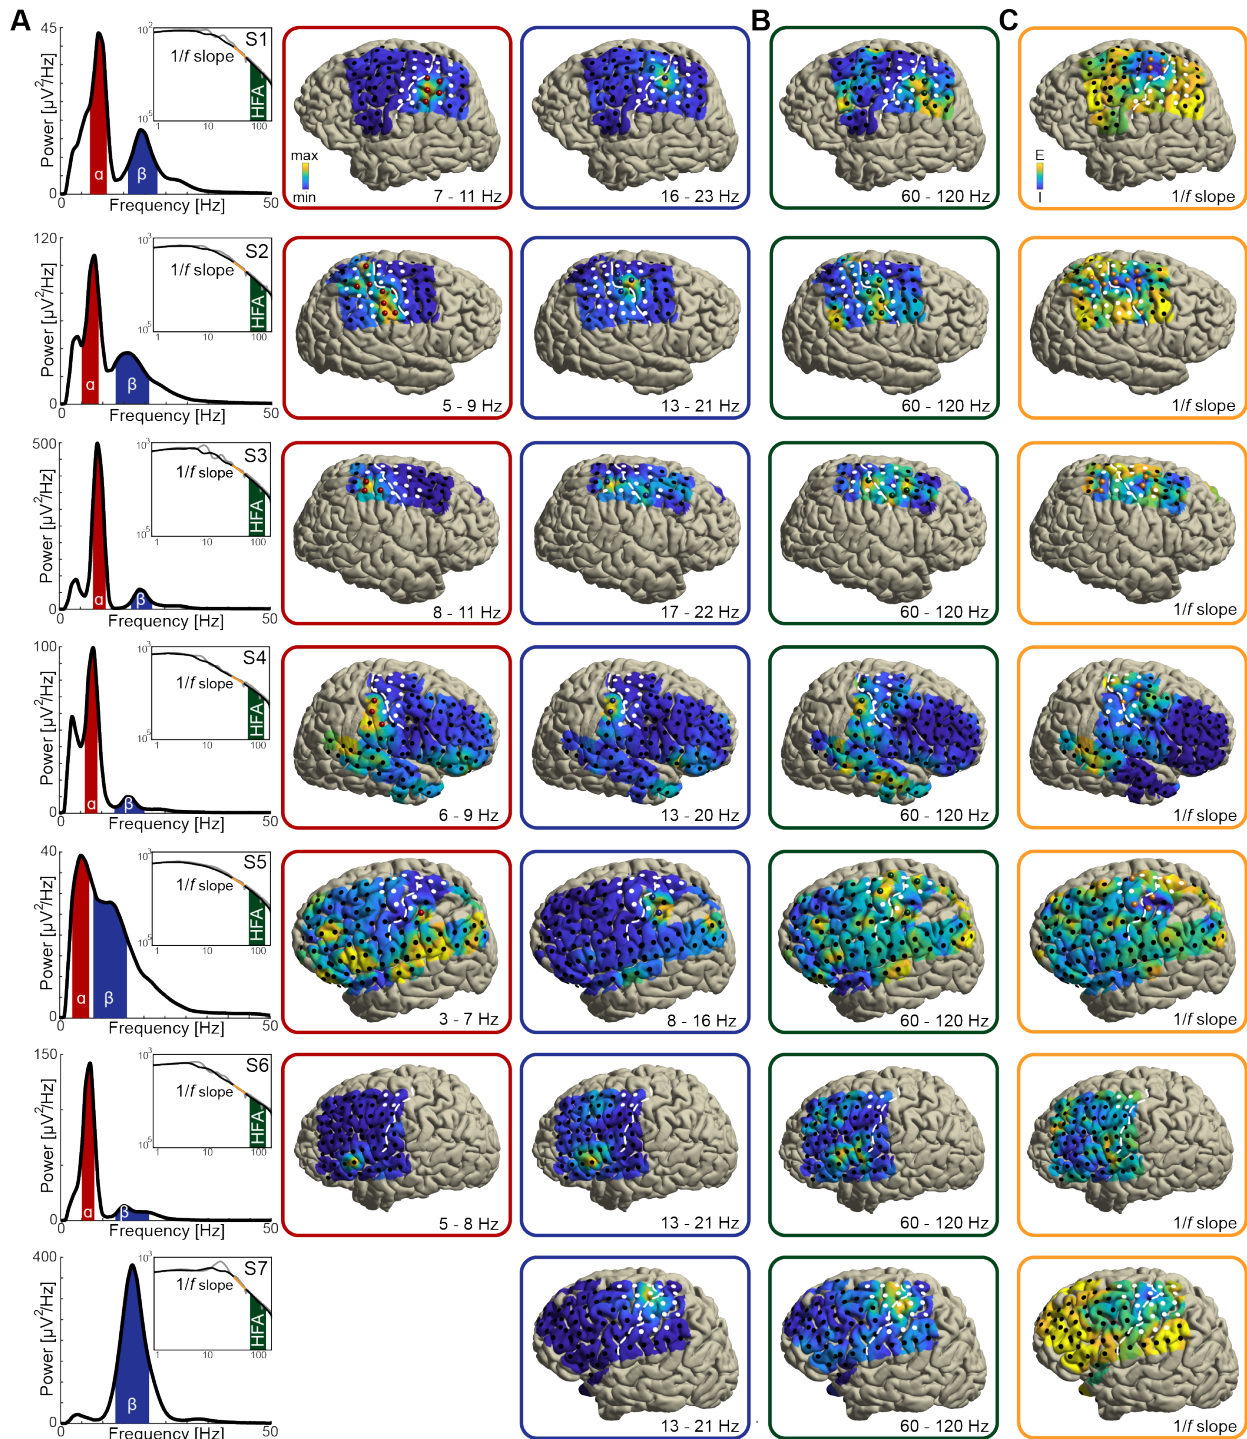

1008

1009 **Supplemental Figure 1.** As in Figure 2A-C, for seven individuals with sensorimotor coverage. Participant S7  
1010 lacked a rhythmic power-spectral component in the alpha frequency range (around 8 - 12 Hz; see bottom left  
1011 power-spectrum in A) and was excluded from further analysis.

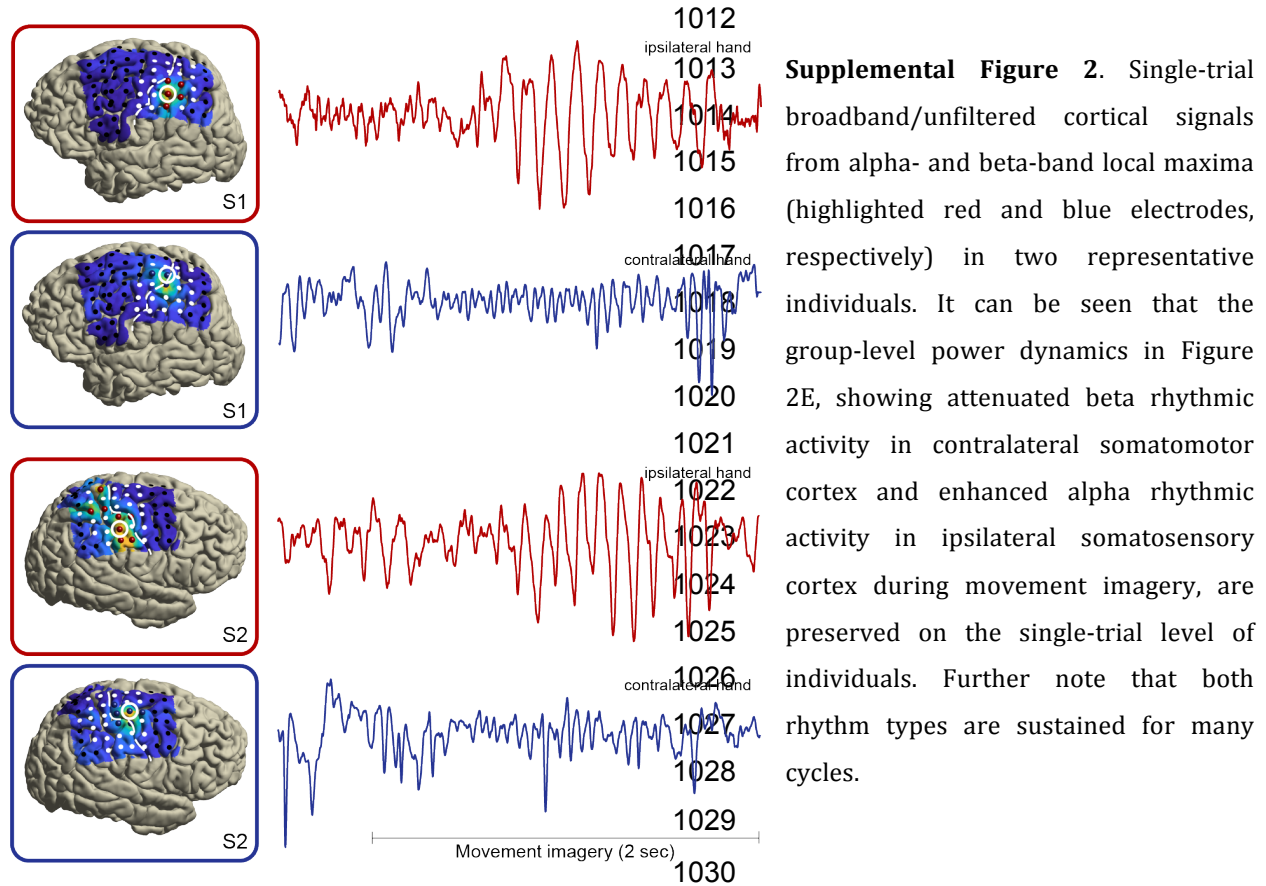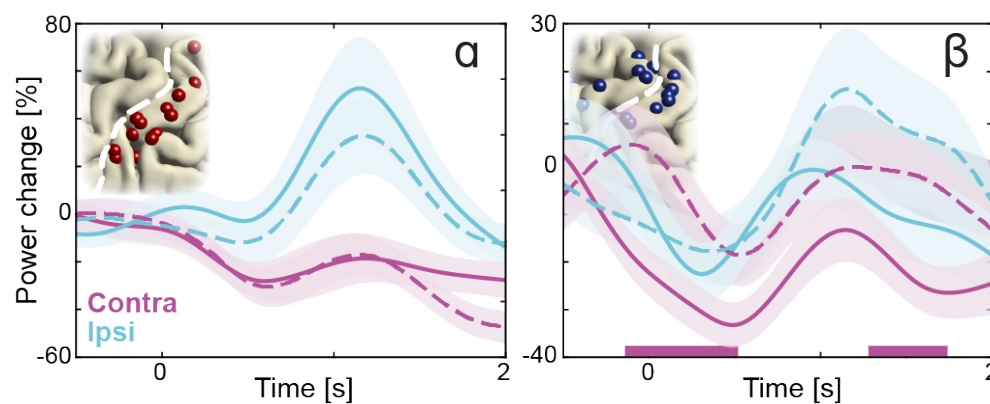

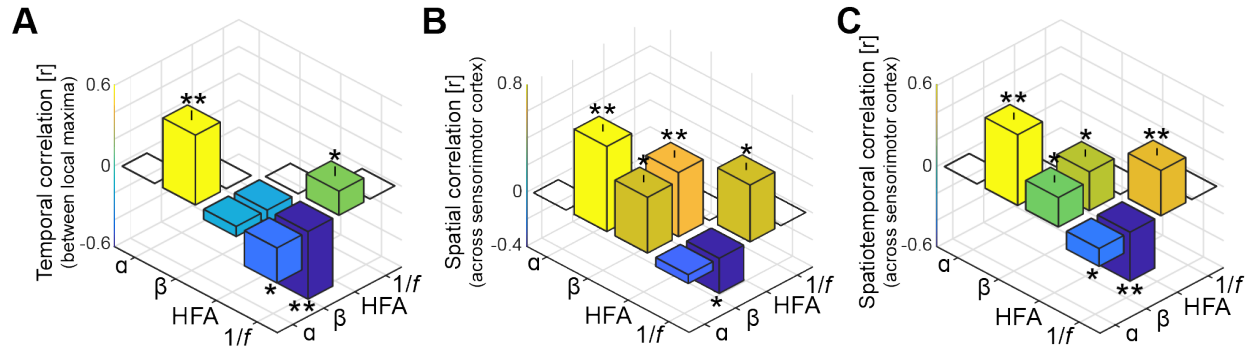

1039

1040 **Supplemental Figure 4.** As in Figure 3A-C, but without accounting for shared variance in alpha- and beta-  
1041 band frequency bands originating from concurrent  $1/f$  modulations in the power-spectrum. It can be seen  
1042 from the leftmost bars in these figures that without the separation of rhythmic and arrhythmic activity in the  
1043 power-spectrum, alpha- and beta-band rhythms appear temporally and spatially correlated.

1044

1045

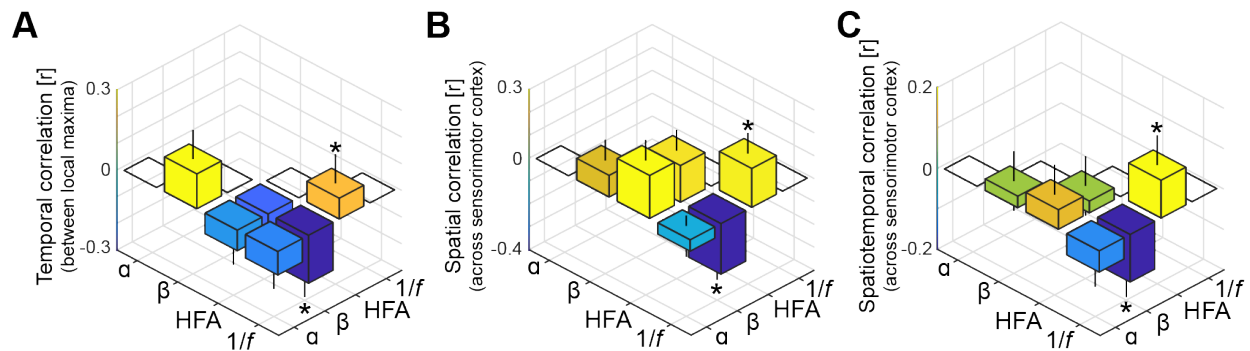

1046

1047 **Supplemental Figure 5.** As in Figure 3A-C, but with high-frequency activity and the  $1/f$  slope index based on  
1048 the rhythmic component rather than on the arrhythmic component of the power-spectrum. It can be seen  
1049 that interactions involving low-frequency phenomena (alpha- and beta-band rhythmic activity) and local  
1050 excitability metrics (high-frequency activity and the  $1/f$  slope) are substantially weaker compared to the  
1051 original correlations shown in Figure 3, despite that all spectral features are based on the same rhythmic  
1052 component of the power-spectrum.

1053

1054

1055

1056

1057

1058

1059

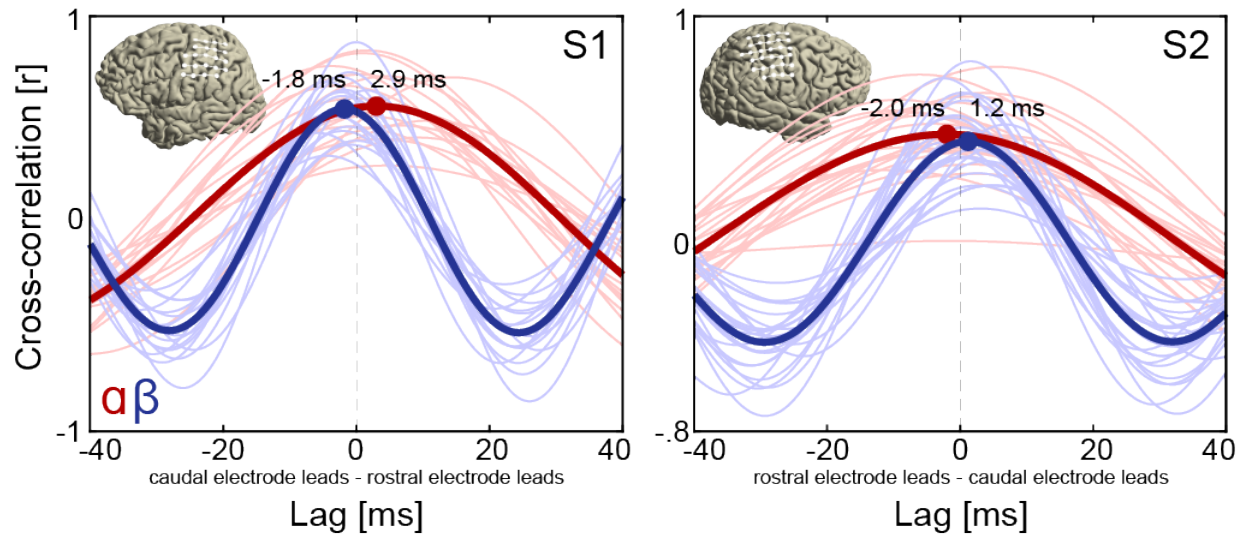

1060  
 1061 **Supplemental Figure 6.** Cross-correlation functions of alpha and beta rhythmic activity at rostro-caudal  
 1062 electrode pairs on the sensorimotor cortex of two representative individuals. It can be seen that rostral  
 1063 electrodes led caudal electrodes in the alpha frequency range during movement imagery (red lines),  
 1064 consistent with alpha waves traveling in a rostral direction. Conversely, caudal electrodes led rostral  
 1065 electrodes in the beta frequency range (blue lines), consistent with beta waves traveling in a caudal direction.  
 1066 This pattern of directionality is consistent with the instantaneous phase-based representations in Figure 4,  
 1067 showing concurrent alpha and beta waves traveling along opposite directions during movement imagery.  
 1068 Thin lines indicate mean cross-correlation functions across trials at individual electrode pairs. Thick lines  
 1069 indicate mean cross-correlation functions across all electrode pairs. White markers and lines on the brain  
 1070 insets indicate rostro-caudal electrode pairs on which amplitude-based cross-correlations were based. All  
 1071 lags were statistically significant (see Supplemental Analyses for details). Note that rostro-caudal direction is  
 1072 flipped on the x-axis of participant S2.  
 1073

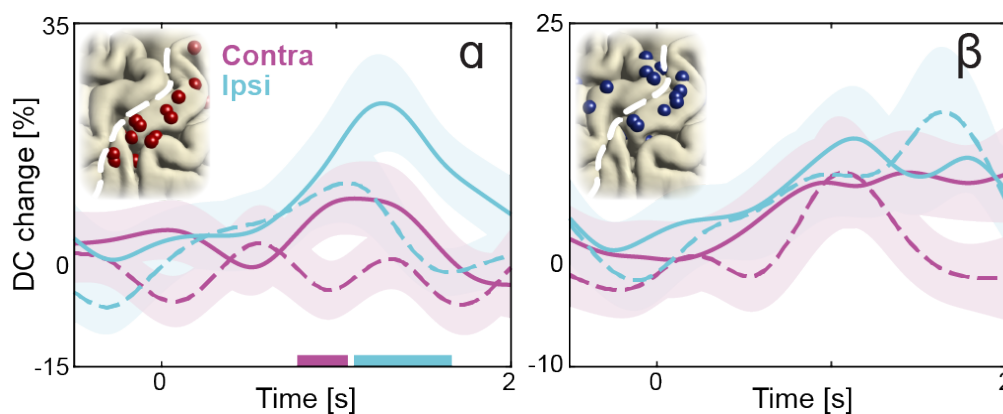

1074  
 1075 **Supplemental Figure 7.** As in Figure 4D, but with directional consistency of wave propagation for high  
 1076 demand trials (solid lines, cylinder orientations that afforded both overhand and underhand grasping) and

1077 for low demand trials (dashed lines, cylinder orientations that afforded grasping in a single manner only).  
1078 Alpha waves propagated more consistently through alpha-band local maxima during imagined movement on  
1079 high demand trials. Colored bars along the x-axes indicate time intervals of statistically significant task  
1080 demand effects.

1081  
1082 **Supplemental Movie 1.** Time-lapse movie of concurrent traveling alpha and beta waves in participant S1  
1083 during movement imagery. Cortical phase maps indicate the average phase at each cortical site relative to a  
1084 central sensorimotor reference electrode. Small cone-shaped arrows indicate the mean propagation direction  
1085 at each stimulation-positive electrode, with arrow size weighted by the local phase gradient magnitude. Large  
1086 arrows indicate the mean propagation direction across sensorimotor cortex, with arrow size weighted by the  
1087 alignment of sensorimotor gradients (phase gradient directionality, PGD). Time is in seconds after cylinder  
1088 appearance.

1089  
1090 **Supplemental Movie 2.** As in Movie 1, for participant S2.

1091  
1092 **Supplemental Data.** Analysis code for the extraction of spectral features from the electrophysiological signal.

1093  
1094 **Supplemental Analyses.** Several control analyses were performed to test for alternative interpretations of  
1095 the findings obtained with the IRASA technique and the  $1/f$  slope index. First, the main analysis considering  
1096 spectral features obtained using the IRASA technique revealed uncorrelated alpha and beta rhythmic activity  
1097 in sensorimotor cortex. We performed an additional analysis testing whether power in the two frequency  
1098 bands is also uncorrelated when broadband  $1/f$  components of the signal are not accounted for, i.e., using the  
1099 original power-spectra. It can be seen from the leftmost bars in Figure S4 that performing the same  
1100 correlation analysis on the original power-spectra yielded strong temporal and spatial correlations between  
1101 alpha- and beta-band power. This observation underscores the importance of accounting for shared variance  
1102 in alpha and beta power envelopes originating from broadband  $1/f$  modulations. Second, the main analysis  
1103 investigating the influence of rhythmic activity on local excitability found that the slope of the arrhythmic  $1/f$   
1104 component had a differential relationship with alpha and beta rhythmic activity during movement imagery. It  
1105 could be argued that the relation between beta rhythmic activity and the  $1/f$  slope was artificially stronger  
1106 because of the beta-band being closer than the alpha-band to the 30-50 Hz band of the power-spectrum on  
1107 which the  $1/f$  slope index is based. Accordingly, we performed an additional analysis grounded on the idea  
1108 that a spurious interaction between beta-band power and the steepness of the  $1/f$  slope should be amplified  
1109 when both spectral features are directly based on the same (rhythmic) component of the power-spectrum,  
1110 resulting in stronger correlations. As can be seen from Figure S5, correlations between beta-band power and  
1111 the steepness of the  $1/f$  slope were substantially reduced with both features based on the same component,  
1112 compared to the original correlations shown in Figure 3. This observation indicates that the reciprocal

1113 changes between beta rhythmic activity and the slope of the arrhythmic  $1/f$  component cannot be readily  
1114 explained by a spurious relationship between these two spectral features.

1115         Several other control analyses were performed to examine further the robustness and functional  
1116 relevance of alpha and beta traveling waves. First, it could be argued that the traveling wave analyses  
1117 depended on relatively noise-sensitive instantaneous estimates of phase and subsequent circular statistics.  
1118 Accordingly, we performed an additional analysis that considered the entire time-series of alpha and beta  
1119 rhythmic activity during movement imagery. Following insight from our phase-based analyses, showing  
1120 activity moving along a rostro-caudal direction across the frontoparietal cortex, we calculated amplitude-  
1121 based cross-correlations between electrode pairs aligned with the rostro-caudal axis in two representative  
1122 individuals (see the brain insets in Figure S6). We rejected electrode pairs with cross-correlation functions  
1123 explaining less than 50% of the mean distribution of cross-correlation in the sensorimotor cortex, based on  
1124 leave-one-out cross-validation (1 and 3 alpha-band cross-correlation functions were held out in participants  
1125 S1 and S2, respectively). This analysis showed that rostral electrodes led caudal electrodes in the alpha  
1126 frequency range (red lines in Figure S6), consistent with alpha waves traveling in a rostral direction.  
1127 Conversely, caudal electrodes led rostral electrodes in the beta frequency range (blue lines in the same  
1128 figure), consistent with beta waves traveling in a caudal direction ( $p < 0.001$  for all lags, estimated from  
1129 shuffled data using one-sample  $t$ -tests). This pattern of directionality is consistent with the instantaneous  
1130 phase-based representations in Figure 4, showing concurrent alpha and beta waves traveling along opposite  
1131 directions during movement imagery. Second, we examined whether the task-relevant traveling waves were  
1132 additionally sensitive to selection demands during movement imagery. To this end, we examined the  
1133 directional consistency (DC) of those waves, which measures the degree of consistency across trials in the  
1134 phase-gradient direction. In the main analysis, it was found that alpha waves traveled more consistently  
1135 through alpha-band local maxima ipsilateral to the selected arm during movement imagery, as compared to  
1136 baseline levels (Figure 4D). As seen in Figure S7, alpha waves propagated even more consistently through  
1137 alpha-band local maxima during imagined movement of high demand trials, as compared to low demand  
1138 trials. This effect occurred around the same time as alpha-band power increased during imagined movement  
1139 of the ipsilateral hand (Figure 2E), particularly when selection demands were high (Figure S3). Taken  
1140 together, these additional observations are consistent with the main findings of the study. Alpha and beta  
1141 rhythm-dependent (dis)inhibition is task-relevant and propagated in a consistent spatiotemporal pattern.
